# Supplementary material for: Antibiotic Resistance Profile of Staphylococcus aureus in Cancer Patients at Laquintinie Hospital in Douala, Littoral Region, Cameroon
Source: Hindawi journal article supplement (doi:10.1155/2024/5859068), 2024-05-15
Supplement: f1 [file 5859068.f1.pdf]

Antibiotic Resistance Profile of *Staphylococcus aureus* in Cancer Patients at  
Laquintinie Hospital in Douala, Littoral Region, Cameroon

Michael Francis Kengne<sup>a</sup>, Armelle T. Mbaveng<sup>a\*</sup>, Victor Kuete<sup>a\*\*</sup>

<sup>a</sup>Department of Biochemistry, Faculty of Science, University of Dschang, Dschang,  
Cameroon

Corresponding author:

\*Email: [armbatsa@yahoo.fr](mailto:armbatsa@yahoo.fr); ORCID: <https://orcid.org/0000-0003-4178-4967> (Armelle T.  
Mbaveng)

\*\*Email: [kuetevictor@yahoo.fr](mailto:kuetevictor@yahoo.fr); ORCID: <http://orcid.org/0000-0002-1070-1236> (Victor  
Kuete)

Other authors emails:

Email: [fnkengne@yahoo.com](mailto:fnkengne@yahoo.com) (Michael Francis Kengne)

## S1. Participants and their Features

| Patients     | Patient features |     |           |                  |                |                |
|--------------|------------------|-----|-----------|------------------|----------------|----------------|
| Patient Code | Sex              | Age | Age range | Education level  | Profession     | Marital status |
| K001         | M                | 30  | [30-40[   | Secondary school | Private sector | Bachelor       |
| K002         | M                | 54  | [50-60[   | Primary school   | Private sector | Bride          |
| K003         | F                | 50  | [50-60[   | Secondary school | Household      | Bride          |
| K004         | F                | 49  | [40-50[   | Primary school   | Household      | Bride          |
| K005         | M                | 31  | [30-40[   | Higher education | Private sector | Bachelor       |
| K006         | M                | 59  | [50-60[   | Secondary school | Private sector | Bride          |
| K007         | F                | 67  | ≥60       | Primary school   | Household      | Widow(er)      |
| K008         | M                | 38  | [30-40[   | Secondary school | Jobless        | Bachelor       |
| K009         | F                | 42  | [40-50[   | Secondary school | Civil servant  | Widow(er)      |
| K010         | F                | 43  | [40-50[   | Secondary school | Civil servant  | Bride          |
| K011         | F                | 41  | [40-50[   | Secondary school | Household      | Bride          |
| K012         | M                | 82  | ≥60       | Analphabet       | Private sector | Bride          |
| K013         | F                | 54  | [50-60[   | Primary school   | Household      | Widow(er)      |
| K014         | M                | 18  | <20       | Secondary school | Student        | Bachelor       |
| K015         | F                | 33  | [30-40[   | Higher education | Civil servant  | Bride          |
| K016         | M                | 42  | [40-50[   | Higher education | Civil servant  | Bride          |
| K017         | M                | 68  | ≥60       | Primary school   | Private sector | Bride          |
| K018         | M                | 66  | ≥60       | Analphabet       | Jobless        | Bride          |
| K019         | M                | 70  | ≥60       | Analphabet       | Private sector | Bride          |
| K020         | F                | 43  | [40-50[   | Secondary school | Household      | Bride          |
| K021         | M                | 61  | ≥60       | Secondary school | Jobless        | Bride          |
| K022         | M                | 64  | ≥60       | Higher education | Jobless        | Bride          |
| K023         | M                | 57  | [50-60[   | Secondary school | Jobless        | Bride          |

|      |   |    |         |                  |                |           |
|------|---|----|---------|------------------|----------------|-----------|
| K024 | M | 53 | [50-60[ | Secondary school | Private sector | Bachelor  |
| K025 | F | 64 | ≥60     | Primary school   | Household      | Widow(er) |
| K026 | M | 29 | [20-30[ | Secondary school | Private sector | Bachelor  |
| K027 | M | 75 | ≥60     | Primary school   | Jobless        | Bride     |
| K028 | F | 62 | ≥60     | Primary school   | Household      | Bride     |
| K029 | F | 58 | [50-60[ | Secondary school | Household      | Bride     |
| K030 | F | 40 | [40-50[ | Secondary school | Household      | Bachelor  |
| K031 | M | 65 | ≥60     | Secondary school | Jobless        | Bride     |
| K032 | F | 50 | [50-60[ | Secondary school | Household      | Bride     |
| K033 | F | 27 | [20-30[ | Secondary school | Civil servant  | Bachelor  |
| K034 | F | 38 | [30-40[ | Higher education | Civil servant  | Bachelor  |
| K035 | F | 43 | [40-50[ | Secondary school | Household      | Bride     |
| K036 | F | 52 | [50-60[ | Higher education | Household      | Bride     |
| K037 | F | 40 | [40-50[ | Secondary school | Household      | Bride     |
| K038 | M | 43 | [40-50[ | Primary school   | Jobless        | Bride     |
| K039 | M | 74 | ≥60     | Analphabet       | Jobless        | Bride     |
| K040 | M | 75 | ≥60     | Primary school   | Jobless        | Bride     |
| K041 | M | 51 | [50-60[ | Secondary school | Private sector | Widow(er) |
| K042 | F | 74 | ≥60     | Analphabet       | Household      | Widow(er) |
| K043 | F | 72 | ≥60     | Analphabet       | Household      | Widow(er) |
| K044 | F | 43 | [40-50[ | Secondary school | Private sector | Bride     |
| K045 | M | 56 | [50-60[ | Secondary school | Private sector | Bride     |
| K046 | F | 67 | ≥60     | Analphabet       | Private sector | Widow(er) |
| K047 | M | 43 | [40-50[ | Secondary school | Private sector | Bride     |
| K048 | F | 55 | [50-60[ | Secondary school | Household      | Widow(er) |
| K049 | F | 50 | [50-60[ | Secondary school | Household      | Bride     |
| K050 | M | 50 | [50-60[ | Higher education | Civil servant  | Bride     |
| K051 | F | 42 | [40-50[ | Secondary school | Private sector | Bachelor  |
| K052 | F | 45 | [40-50[ | Secondary school | Household      | Bride     |

|      |   |    |         |                  |                |           |
|------|---|----|---------|------------------|----------------|-----------|
| K053 | F | 47 | [40-50[ | Secondary school | Private sector | Bride     |
| K054 | F | 63 | ≥60     | Secondary school | Household      | Widow(er) |
| K055 | F | 10 | <20     | Primary school   | Student        | Bachelor  |
| K056 | F | 69 | ≥60     | Primary school   | Private sector | Bride     |
| K057 | M | 66 | ≥60     | Secondary school | Civil servant  | Bride     |
| K058 | F | 59 | [50-60[ | Analphabet       | Private sector | Widow(er) |
| K059 | M | 60 | ≥60     | Secondary school | Civil servant  | Bride     |
| K060 | F | 56 | [50-60[ | Secondary school | Household      | Bride     |
| K061 | F | 40 | [40-50[ | Secondary school | Household      | Bride     |
| K062 | F | 38 | [30-40[ | Primary school   | Household      | Bride     |
| K063 | M | 78 | ≥60     | Secondary school | Jobless        | Bride     |
| K064 | F | 60 | ≥60     | Primary school   | Private sector | Bride     |
| K065 | M | 68 | ≥60     | Secondary school | Civil servant  | Bride     |
| K066 | M | 77 | ≥60     | Analphabet       | Private sector | Bride     |
| K067 | M | 39 | [30-40[ | Higher education | Civil servant  | Bride     |
| K068 | F | 36 | [30-40[ | Secondary school | Private sector | Bachelor  |
| K069 | M | 34 | [30-40[ | Secondary school | Jobless        | Bachelor  |
| K070 | M | 29 | [20-30[ | Secondary school | Private sector | Bachelor  |
| K071 | M | 55 | [50-60[ | Secondary school | Civil servant  | Divorced  |
| K072 | F | 57 | [50-60[ | Secondary school | Private sector | Divorced  |
| K073 | F | 41 | [40-50[ | Secondary school | Household      | Bride     |
| K074 | F | 23 | [20-30[ | Secondary school | Student        | Bachelor  |
| K075 | F | 65 | ≥60     | Secondary school | Household      | Widow(er) |
| K076 | F | 75 | ≥60     | Primary school   | Household      | Widow(er) |
| K077 | M | 47 | [40-50[ | Primary school   | Private sector | Bride     |
| K078 | M | 57 | [50-60[ | Primary school   | Private sector | Bride     |
| K079 | F | 50 | [50-60[ | Higher education | Civil servant  | Bride     |
| K080 | F | 41 | [40-50[ | Secondary school | Jobless        | Bachelor  |
| K081 | F | 60 | ≥60     | Secondary school | Household      | Bride     |

|      |   |    |         |                  |                |           |
|------|---|----|---------|------------------|----------------|-----------|
| K082 | F | 51 | [50-60[ | Secondary school | Household      | Bride     |
| K083 | F | 49 | [40-50[ | Secondary school | Household      | Bride     |
| K084 | M | 70 | ≥60     | Higher education | Civil servant  | Bride     |
| K085 | F | 44 | [40-50[ | Secondary school | Household      | Bride     |
| K086 | M | 70 | ≥60     | Secondary school | Jobless        | Bride     |
| K087 | F | 67 | ≥60     | Secondary school | Household      | Bride     |
| K088 | F | 44 | [40-50[ | Secondary school | Household      | Bride     |
| K089 | M | 75 | ≥60     | Secondary school | Jobless        | Bride     |
| K090 | M | 50 | [50-60[ | Secondary school | Civil servant  | Bride     |
| K091 | M | 58 | [50-60[ | Analphabet       | Household      | Bride     |
| K092 | F | 37 | [30-40[ | Secondary school | Household      | Bride     |
| K093 | F | 48 | [40-50[ | Secondary school | Private sector | Bride     |
| K094 | M | 33 | [30-40[ | Secondary school | Private sector | Bachelor  |
| K095 | F | 50 | [50-60[ | Secondary school | Private sector | Bride     |
| K096 | M | 69 | ≥60     | Secondary school | Jobless        | Bride     |
| K097 | F | 48 | [40-50[ | Secondary school | Household      | Bride     |
| K098 | F | 15 | <20     | Secondary school | Student        | Bachelor  |
| K099 | M | 58 | [50-60[ | Secondary school | Jobless        | Bride     |
| K100 | F | 52 | [50-60[ | Secondary school | Household      | Bride     |
| K101 | F | 29 | [20-30[ | Secondary school | Civil servant  | Bachelor  |
| K102 | M | 13 | <20     | Primary school   | Student        | Bachelor  |
| K103 | M | 32 | [30-40[ | Secondary school | Private sector | Bachelor  |
| K104 | F | 54 | [50-60[ | Secondary school | Household      | Bachelor  |
| K105 | F | 56 | [50-60[ | Secondary school | Civil servant  | Widow(er) |
| K106 | F | 41 | [40-50[ | Secondary school | Household      | Bride     |
| K107 | M | 11 | <20     | Primary school   | Student        | Bachelor  |
| K108 | F | 44 | [40-50[ | Secondary school | Civil servant  | Bride     |
| K109 | F | 43 | [40-50[ | Secondary school | Household      | Bride     |
| K110 | F | 38 | [30-40[ | Secondary school | Household      | Bride     |

|      |   |    |         |                  |                |           |
|------|---|----|---------|------------------|----------------|-----------|
| K111 | F | 12 | <20     | Primary school   | Student        | Bachelor  |
| K112 | F | 41 | [40-50[ | Secondary school | Household      | Bride     |
| K113 | M | 57 | [50-60[ | Secondary school | Jobless        | Bride     |
| K114 | F | 38 | [30-40[ | Secondary school | Civil servant  | Bride     |
| K115 | F | 54 | [50-60[ | Secondary school | Household      | Bride     |
| K116 | F | 44 | [40-50[ | Secondary school | Private sector | Bride     |
| K117 | F | 50 | [50-60[ | Secondary school | Household      | Bride     |
| K118 | M | 71 | ≥60     | Secondary school | Jobless        | Bride     |
| K119 | F | 68 | ≥60     | Analphabet       | Household      | Bride     |
| K120 | F | 61 | ≥60     | Analphabet       | Household      | Widow(er) |
| K121 | F | 60 | ≥60     | Analphabet       | Household      | Widow(er) |
| K122 | F | 49 | [40-50[ | Secondary school | Civil servant  | Bride     |
| K123 | F | 39 | [30-40[ | Secondary school | Household      | Bride     |
| K124 | M | 37 | [30-40[ | Secondary school | Private sector | Bride     |
| K125 | F | 64 | ≥60     | Secondary school | Household      | Bride     |
| K126 | F | 36 | [30-40[ | Secondary school | Household      | Bachelor  |
| K127 | F | 45 | [40-50[ | Secondary school | Civil servant  | Bride     |
| K128 | F | 50 | [50-60[ | Secondary school | Household      | Bride     |
| K129 | F | 30 | [30-40[ | Secondary school | Household      | Bride     |
| K130 | F | 45 | [40-50[ | Secondary school | Private sector | Bachelor  |
| K131 | F | 47 | [40-50[ | Primary school   | Household      | Bride     |
| K132 | F | 76 | ≥60     | Analphabet       | Household      | Widow(er) |
| K133 | F | 40 | [40-50[ | Higher education | Civil servant  | Bride     |
| K134 | F | 27 | [20-30[ | Higher education | Civil servant  | Bride     |
| K135 | M | 80 | ≥60     | Analphabet       | Jobless        | Bride     |
| K136 | F | 55 | [50-60[ | Analphabet       | Household      | Bride     |
| K137 | M | 11 | <20     | Primary school   | Student        | Bachelor  |
| K138 | F | 50 | [50-60[ | Analphabet       | Household      | Bride     |
| K139 | M | 10 | <20     | Primary school   | Student        | Bachelor  |

|      |   |    |         |                  |                |           |
|------|---|----|---------|------------------|----------------|-----------|
| K140 | M | 63 | ≥60     | Primary school   | Private sector | Bride     |
| K141 | F | 19 | <20     | Secondary school | Student        | Bachelor  |
| K142 | M | 42 | [40-50[ | Secondary school | Private sector | Bride     |
| K143 | M | 32 | [30-40[ | Analphabet       | Jobless        | Bride     |
| K144 | M | 46 | [40-50[ | Secondary school | Private sector | Bride     |
| K145 | F | 54 | [50-60[ | Primary school   | Private sector | Bride     |
| K146 | F | 43 | [40-50[ | Secondary school | Household      | Bachelor  |
| K147 | M | 58 | [50-60[ | Primary school   | Private sector | Bride     |
| K148 | F | 72 | ≥60     | Analphabet       | Household      | Widow(er) |
| K149 | F | 49 | [40-50[ | Secondary school | Household      | Bride     |
| K150 | F | 79 | ≥60     | Analphabet       | Household      | Widow(er) |
| K151 | F | 62 | ≥60     | Primary school   | Private sector | Bride     |
| K152 | F | 66 | ≥60     | Analphabet       | Household      | Widow(er) |
| K153 | F | 66 | ≥60     | Analphabet       | Household      | Bride     |
| K154 | F | 51 | [50-60[ | Primary school   | Household      | Bachelor  |
| K155 | F | 46 | [40-50[ | Secondary school | Civil servant  | Bachelor  |
| K156 | F | 60 | ≥60     | Primary school   | Household      | Bride     |
| K157 | F | 68 | ≥60     | Secondary school | Household      | Bride     |
| K158 | M | 61 | ≥60     | Secondary school | Civil servant  | Bride     |
| K159 | M | 45 | [40-50[ | Secondary school | Jobless        | Bachelor  |
| K160 | F | 47 | [40-50[ | Secondary school | Household      | Bachelor  |
| K161 | F | 32 | [30-40[ | Higher education | Civil servant  | Bachelor  |
| K162 | F | 54 | [50-60[ | Analphabet       | Private sector | Bride     |
| K163 | F | 64 | ≥60     | Analphabet       | Household      | Bachelor  |
| K164 | F | 48 | [40-50[ | Secondary school | Household      | Bride     |
| K165 | M | 43 | [40-50[ | Secondary school | Private sector | Bride     |
| K166 | M | 64 | ≥60     | Secondary school | Jobless        | Bride     |
| K167 | F | 60 | ≥60     | Primary school   | Household      | Bride     |
| K168 | M | 56 | [50-60[ | Primary school   | Private sector | Bride     |

|      |   |    |         |                  |                |          |
|------|---|----|---------|------------------|----------------|----------|
| K169 | M | 47 | [40-50[ | Secondary school | Private sector | Bride    |
| K170 | F | 56 | [50-60[ | Secondary school | Household      | Bride    |
| K171 | F | 39 | [30-40[ | Higher education | Civil servant  | Bride    |
| K172 | F | 31 | [30-40[ | Secondary school | Household      | Bachelor |
| K173 | M | 57 | [50-60[ | Secondary school | Civil servant  | Bride    |
| K174 | M | 54 | [50-60[ | Secondary school | Jobless        | Bride    |
| K175 | M | 28 | [20-30[ | Secondary school | Student        | Bachelor |
| K176 | M | 45 | [40-50[ | Primary school   | Private sector | Bride    |
| K177 | M | 62 | ≥60     | Primary school   | Private sector | Bride    |
| K178 | M | 62 | ≥60     | Secondary school | Private sector | Bride    |
| K179 | M | 55 | [50-60[ | Secondary school | Civil servant  | Bride    |
| K180 | F | 46 | [40-50[ | Secondary school | Private sector | Bachelor |
| K181 | M | 42 | [40-50[ | Primary school   | Private sector | Bride    |
| K182 | M | 72 | ≥60     | Primary school   | Jobless        | Bride    |
| K183 | F | 45 | [40-50[ | Secondary school | Private sector | Bride    |
| K184 | M | 69 | ≥60     | Secondary school | Jobless        | Bride    |
| K185 | F | 36 | [30-40[ | Higher education | Civil servant  | Bride    |
| K186 | M | 41 | [40-50[ | Secondary school | Household      | Bride    |
| K187 | F | 47 | [40-50[ | Secondary school | Household      | Bride    |
| K188 | M | 67 | ≥60     | Analphabet       | Private sector | Bride    |
| K189 | F | 63 | ≥60     | Analphabet       | Household      | Bride    |
| K190 | F | 66 | ≥60     | Secondary school | Household      | Bachelor |
| K191 | M | 28 | [20-30[ | Secondary school | Private sector | Bachelor |
| K192 | M | 54 | [50-60[ | Secondary school | Private sector | Bride    |
| K193 | M | 41 | [40-50[ | Secondary school | Private sector | Bride    |
| K194 | F | 36 | [30-40[ | Primary school   | Civil servant  | Bachelor |
| K195 | M | 48 | [40-50[ | Higher education | Civil servant  | Bride    |
| K196 | F | 64 | ≥60     | Analphabet       | Household      | Bachelor |
| K197 | M | 60 | ≥60     | Secondary school | Civil servant  | Bride    |



|      |   |    |         |                  |                |           |
|------|---|----|---------|------------------|----------------|-----------|
| K198 | M | 45 | [40-50[ | Secondary school | Civil servant  | Bachelor  |
| K199 | M | 41 | [40-50[ | Primary school   | Private sector | Bachelor  |
| K200 | F | 54 | [50-60[ | Secondary school | Household      | Bride     |
| K201 | M | 37 | [30-40[ | Secondary school | Private sector | Bachelor  |
| K202 | M | 39 | [30-40[ | Secondary school | Private sector | Bachelor  |
| K203 | M | 43 | [40-50[ | Primary school   | Jobless        | Bachelor  |
| K204 | F | 60 | ≥60     | Primary school   | Household      | Bachelor  |
| K205 | F | 43 | [40-50[ | Secondary school | Civil servant  | Bride     |
| K206 | F | 40 | [40-50[ | Primary school   | Household      | Bride     |
| K207 | M | 44 | [40-50[ | Analphabet       | Private sector | Bride     |
| K208 | F | 61 | ≥60     | Secondary school | Household      | Bride     |
| K209 | F | 56 | [50-60[ | Primary school   | Household      | Bride     |
| K210 | F | 31 | [30-40[ | Secondary school | Household      | Bachelor  |
| K211 | F | 62 | ≥60     | Secondary school | Household      | Bride     |
| K212 | M | 52 | [50-60[ | Higher education | Civil servant  | Bride     |
| K213 | F | 63 | ≥60     | Secondary school | Household      | Bride     |
| K214 | F | 39 | [30-40[ | Secondary school | Private sector | Bride     |
| K215 | F | 45 | [40-50[ | Higher education | Household      | Bride     |
| K216 | M | 44 | [40-50[ | Higher education | Civil servant  | Bride     |
| K217 | F | 31 | [30-40[ | Higher education | Civil servant  | Bride     |
| K218 | F | 47 | [40-50[ | Higher education | Civil servant  | Bride     |
| K219 | F | 36 | [30-40[ | Secondary school | Private sector | Bachelor  |
| K220 | F | 28 | [20-30[ | Secondary school | Private sector | Bachelor  |
| K221 | F | 47 | [40-50[ | Secondary school | Household      | Bride     |
| K222 | F | 42 | [40-50[ | Secondary school | Private sector | Bride     |
| K223 | F | 72 | ≥60     | Primary school   | Household      | Widow(er) |
| K224 | F | 49 | [40-50[ | Secondary school | Household      | Bride     |
| K225 | F | 36 | [30-40[ | Secondary school | Private sector | Bride     |
| K226 | F | 45 | [40-50[ | Secondary school | Household      | Bride     |

|      |   |    |         |                  |                |           |
|------|---|----|---------|------------------|----------------|-----------|
| K227 | F | 75 | ≥60     | Analphabet       | Household      | Widow(er) |
| K228 | F | 29 | [20-30[ | Secondary school | Household      | Bride     |
| K229 | M | 46 | [40-50[ | Primary school   | Private sector | Bride     |
| K230 | F | 45 | [40-50[ | Secondary school | Private sector | Bride     |
| K231 | F | 54 | [50-60[ | Secondary school | Private sector | Bride     |
| K232 | F | 47 | [40-50[ | Secondary school | Private sector | Bride     |
| K233 | F | 49 | [40-50[ | Analphabet       | Household      | Bride     |
| K234 | F | 36 | [30-40[ | Secondary school | Private sector | Bachelor  |
| K235 | F | 40 | [40-50[ | Secondary school | Civil servant  | Bachelor  |
| K236 | M | 81 | ≥60     | Analphabet       | Jobless        | Bride     |
| K237 | F | 61 | ≥60     | Analphabet       | Private sector | Widow(er) |
| K238 | F | 68 | ≥60     | Analphabet       | Household      | Widow(er) |
| K239 | F | 20 | [20-30[ | Secondary school | Student        | Bachelor  |
| K240 | M | 80 | ≥60     | Analphabet       | Jobless        | Bride     |
| K241 | F | 56 | [50-60[ | Secondary school | Private sector | Bride     |
| K242 | F | 39 | [30-40[ | Secondary school | Civil servant  | Bride     |
| K243 | F | 45 | [40-50[ | Higher education | Civil servant  | Bachelor  |
| K244 | F | 38 | [30-40[ | Secondary school | Private sector | Bachelor  |
| K245 | F | 33 | [30-40[ | Primary school   | Household      | Bride     |
| K246 | F | 76 | ≥60     | Secondary school | Jobless        | Widow(er) |
| K247 | F | 62 | ≥60     | Analphabet       | Household      | Bride     |
| K248 | F | 44 | [40-50[ | Secondary school | Private sector | Bachelor  |
| K249 | F | 43 | [40-50[ | Secondary school | Private sector | Bride     |
| K250 | F | 50 | [50-60[ | Secondary school | Household      | Bride     |
| K251 | F | 45 | [40-50[ | Secondary school | Household      | Bachelor  |
| K252 | M | 14 | <20     | Secondary school | Student        | Bachelor  |
| K253 | F | 43 | [40-50[ | Secondary school | Household      | Bachelor  |
| K254 | F | 61 | ≥60     | Secondary school | Household      | Bride     |
| K255 | M | 71 | ≥60     | Higher education | Jobless        | Bride     |

|      |   |    |         |                  |                |           |
|------|---|----|---------|------------------|----------------|-----------|
| K256 | M | 30 | [30-40[ | Secondary school | Civil servant  | Bachelor  |
| K257 | M | 61 | ≥60     | Analphabet       | Private sector | Bride     |
| K258 | F | 44 | [40-50[ | Secondary school | Civil servant  | Bachelor  |
| K259 | F | 62 | ≥60     | Analphabet       | Household      | Widow(er) |
| K260 | F | 46 | [40-50[ | Secondary school | Civil servant  | Bachelor  |
| K261 | F | 47 | [40-50[ | Primary school   | Household      | Bachelor  |
| K262 | M | 47 | [40-50[ | Analphabet       | Private sector | Bride     |
| K263 | F | 35 | [30-40[ | Secondary school | Household      | Bachelor  |
| K264 | M | 45 | [40-50[ | Primary school   | Private sector | Bachelor  |
| K265 | F | 43 | [40-50[ | Secondary school | Private sector | Bride     |
| K266 | F | 46 | [40-50[ | Secondary school | Private sector | Bride     |
| K267 | F | 54 | [50-60[ | Primary school   | Private sector | Bride     |
| K268 | F | 69 | ≥60     | Secondary school | Household      | Bride     |
| K269 | F | 71 | ≥60     | Analphabet       | Household      | Widow(er) |
| K270 | F | 69 | ≥60     | Analphabet       | Household      | Bride     |
| K271 | F | 58 | [50-60[ | Secondary school | Household      | Bachelor  |
| K272 | F | 46 | [40-50[ | Secondary school | Private sector | Bride     |
| K273 | F | 52 | [50-60[ | Secondary school | Private sector | Bachelor  |
| K274 | F | 39 | [30-40[ | Secondary school | Household      | Bachelor  |
| K275 | F | 52 | [50-60[ | Primary school   | Private sector | Bride     |
| K276 | F | 48 | [40-50[ | Primary school   | Private sector | Bachelor  |
| K277 | F | 53 | [50-60[ | Secondary school | Household      | Bride     |
| K278 | F | 58 | [50-60[ | Primary school   | Household      | Widow(er) |
| K279 | F | 45 | [40-50[ | Secondary school | Private sector | Bride     |
| K280 | M | 41 | [40-50[ | Higher education | Civil servant  | Bride     |
| K281 | F | 49 | [40-50[ | Secondary school | Civil servant  | Bride     |
| K282 | F | 53 | [50-60[ | Primary school   | Private sector | Bachelor  |
| K283 | F | 60 | ≥60     | Analphabet       | Private sector | Bride     |
| K284 | F | 46 | [40-50[ | Secondary school | Household      | Bachelor  |

|                           |   |    |         |                  |                |           |
|---------------------------|---|----|---------|------------------|----------------|-----------|
| K285                      | F | 57 | [50-60[ | Analphabet       | Household      | Bachelor  |
| K286                      | M | 47 | [40-50[ | Higher education | Civil servant  | Bachelor  |
| K287                      | M | 56 | [50-60[ | Analphabet       | Private sector | Bride     |
| K288                      | F | 26 | [20-30[ | Higher education | Student        | Bachelor  |
| K289                      | M | 28 | [20-30[ | Higher education | Student        | Bachelor  |
| K290                      | F | 60 | ≥60     | Analphabet       | Private sector | Widow(er) |
| K291                      | F | 32 | [30-40[ | Higher education | Private sector | Bachelor  |
| K292                      | M | 27 | [20-30[ | Higher education | Student        | Bachelor  |
| K293                      | M | 42 | [40-50[ | Analphabet       | Private sector | Bride     |
| K294                      | F | 41 | [40-50[ | Secondary school | Household      | Bachelor  |
| K295                      | M | 28 | [20-30[ | Secondary school | Civil servant  | Bachelor  |
| K296                      | F | 48 | [40-50[ | Primary school   | Household      | Bride     |
| K297                      | F | 68 | ≥60     | Analphabet       | Household      | Bride     |
| K298                      | F | 64 | ≥60     | Analphabet       | Household      | Bride     |
| K299                      | M | 59 | [50-60[ | Secondary school | Civil servant  | Bride     |
| K300                      | M | 52 | [50-60[ | Secondary school | Civil servant  | Bride     |
| K301                      | M | 25 | [20-30[ | Secondary school | Private sector | Bachelor  |
| K302                      | F | 75 | ≥60     | Analphabet       | Jobless        | Widow(er) |
| K303                      | F | 49 | [40-50[ | Secondary school | Household      | Bachelor  |
| K304                      | F | 41 | [40-50[ | Primary school   | Private sector | Bride     |
| K305                      | F | 63 | ≥60     | Secondary school | Jobless        | Widow(er) |
| K306                      | M | 16 | <20     | Secondary school | Student        | Bachelor  |
| K307                      | F | 50 | [50-60[ | Higher education | Civil servant  | Bride     |
| <b>Non-cancer patient</b> |   |    |         |                  |                |           |
| D001                      | M | 45 | [40-50[ | Secondary school | Private sector | Bride     |
| D002                      | F | 64 | ≥60     | Secondary school | Household      | Bride     |
| D003                      | F | 52 | [50-60[ | Secondary school | Household      | Bride     |

|      |   |    |         |                  |                |           |
|------|---|----|---------|------------------|----------------|-----------|
| D004 | M | 42 | [40-50[ | Secondary school | Civil servant  | Bride     |
| D005 | M | 69 | ≥60     | Analphabet       | Jobless        | Bride     |
| D006 | F | 34 | [30-40[ | Secondary school | Household      | Bride     |
| D007 | M | 49 | [40-50[ | Higher education | Civil servant  | Bride     |
| D008 | F | 44 | [40-50[ | Secondary school | Household      | Bachelor  |
| D009 | M | 77 | ≥60     | Analphabet       | Jobless        | Bride     |
| D010 | M | 10 | <20     | Primary school   | Student        | Bachelor  |
| D011 | M | 40 | [40-50[ | Secondary school | Private sector | Bride     |
| D012 | M | 31 | [30-40[ | Higher education | Student        | Bachelor  |
| D013 | F | 38 | [30-40[ | Secondary school | Private sector | Bachelor  |
| D014 | F | 55 | [50-60[ | Primary school   | Household      | Bride     |
| D015 | F | 41 | [40-50[ | Secondary school | Private sector | Bachelor  |
| D016 | F | 20 | [20-30[ | Secondary school | Student        | Bachelor  |
| D017 | F | 61 | ≥60     | Secondary school | Household      | Widow(er) |
| D018 | F | 23 | [20-30[ | Higher education | Student        | Bachelor  |
| D019 | F | 53 | [50-60[ | Secondary school | Private sector | Bride     |
| D020 | F | 34 | [30-40[ | Secondary school | Jobless        | Bride     |
| D021 | F | 36 | [30-40[ | Higher education | Civil servant  | Bride     |
| D022 | M | 10 | <20     | Primary school   | Student        | Bachelor  |
| D023 | M | 28 | [20-30[ | Secondary school | Civil servant  | Bachelor  |
| D024 | F | 22 | [20-30[ | Secondary school | Student        | Bachelor  |
| D025 | F | 38 | [30-40[ | Primary school   | Household      | Bachelor  |
| D026 | F | 20 | [20-30[ | Secondary school | Student        | Bachelor  |
| D027 | M | 35 | [30-40[ | Secondary school | Private sector | Bride     |
| D028 | F | 40 | [40-50[ | Higher education | Civil servant  | Bride     |
| D029 | F | 53 | [50-60[ | Primary school   | Household      | Bride     |
| D030 | F | 45 | [40-50[ | Higher education | Civil servant  | Bride     |
| D031 | F | 36 | [30-40[ | Higher education | Household      | Bachelor  |
| D032 | M | 63 | ≥60     | Primary school   | Civil servant  | Bride     |

|      |   |    |         |                  |                |           |
|------|---|----|---------|------------------|----------------|-----------|
| D033 | F | 22 | [20-30[ | Secondary school | Student        | Bachelor  |
| D034 | F | 38 | [30-40[ | Higher education | Civil servant  | Bride     |
| D035 | M | 57 | [50-60[ | Secondary school | Private sector | Bride     |
| D036 | F | 20 | [20-30[ | Higher education | Student        | Bachelor  |
| D037 | F | 54 | [50-60[ | Secondary school | Household      | Bride     |
| D038 | F | 27 | [20-30[ | Higher education | Student        | Bachelor  |
| D039 | F | 25 | [20-30[ | Secondary school | Household      | Bride     |
| D040 | F | 58 | [50-60[ | Secondary school | Household      | Bride     |
| D041 | M | 27 | [20-30[ | Higher education | Student        | Bachelor  |
| D042 | F | 66 | ≥60     | Secondary school | Household      | Bride     |
| D043 | M | 10 | <20     | Primary school   | Student        | Bachelor  |
| D044 | F | 37 | [30-40[ | Secondary school | Household      | Bride     |
| D045 | F | 78 | ≥60     | Analphabet       | Household      | Widow(er) |
| D046 | M | 63 | ≥60     | Secondary school | Private sector | Bride     |
| D047 | M | 43 | [40-50[ | Primary school   | Private sector | Bride     |
| D048 | F | 63 | ≥60     | Primary school   | Household      | Bride     |
| D049 | M | 52 | [50-60[ | Secondary school | Civil servant  | Bride     |
| D050 | F | 23 | [20-30[ | Secondary school | Student        | Bachelor  |
| D051 | M | 42 | [40-50[ | Secondary school | Private sector | Bride     |
| D052 | F | 23 | [20-30[ | Higher education | Student        | Bachelor  |
| D053 | F | 54 | [50-60[ | Secondary school | Household      | Bride     |
| D054 | F | 31 | [30-40[ | Secondary school | Household      | Bachelor  |
| D055 | M | 44 | [40-50[ | Secondary school | Civil servant  | Bride     |
| D056 | M | 43 | [40-50[ | Secondary school | Private sector | Bride     |
| D057 | M | 40 | [40-50[ | Secondary school | Private sector | Bride     |
| D058 | M | 47 | [40-50[ | Higher education | Civil servant  | Bride     |
| D059 | M | 10 | <20     | Primary school   | Student        | Bachelor  |
| D060 | M | 41 | [40-50[ | Secondary school | Private sector | Bride     |
| D061 | M | 37 | [30-40[ | Higher education | Civil servant  | Bride     |

|      |   |    |         |                  |                |           |
|------|---|----|---------|------------------|----------------|-----------|
| D062 | F | 17 | <20     | Secondary school | Student        | Bachelor  |
| D063 | F | 30 | [30-40[ | Secondary school | Household      | Bachelor  |
| D064 | F | 38 | [30-40[ | Higher education | Private sector | Bachelor  |
| D065 | M | 30 | [30-40[ | Secondary school | Private sector | Bachelor  |
| D066 | F | 33 | [30-40[ | Secondary school | Household      | Bride     |
| D067 | F | 84 | ≥60     | Analphabet       | Household      | Widow(er) |
| D068 | F | 38 | [30-40[ | Secondary school | Private sector | Bachelor  |
| D069 | M | 48 | [40-50[ | Higher education | Private sector | Bride     |
| D070 | F | 39 | [30-40[ | Primary school   | Household      | Bride     |
| D071 | F | 44 | [40-50[ | Higher education | Private sector | Bride     |
| D072 | F | 34 | [30-40[ | Secondary school | Civil servant  | Bride     |
| D073 | F | 10 | <20     | Primary school   | Student        | Bachelor  |
| D074 | F | 42 | [40-50[ | Secondary school | Private sector | Bride     |
| D075 | F | 36 | [30-40[ | Higher education | Private sector | Bride     |
| D076 | M | 29 | [20-30[ | Higher education | Student        | Bachelor  |
| D077 | F | 20 | [20-30[ | Higher education | Student        | Bachelor  |
| D078 | M | 29 | [20-30[ | Secondary school | Private sector | Bachelor  |
| D079 | F | 10 | <20     | Primary school   | Student        | Bachelor  |
| D080 | M | 81 | ≥60     | Analphabet       | Jobless        | Bride     |
| D081 | F | 29 | [20-30[ | Secondary school | Private sector | Bride     |
| D082 | F | 51 | [50-60[ | Secondary school | Household      | Widow(er) |
| D083 | M | 35 | [30-40[ | Secondary school | Civil servant  | Bride     |
| D084 | F | 51 | [50-60[ | Secondary school | Household      | Bride     |
| D085 | F | 42 | [40-50[ | Secondary school | Household      | Bride     |
| D086 | M | 64 | ≥60     | Secondary school | Civil servant  | Bride     |
| D087 | M | 56 | [50-60[ | Secondary school | Jobless        | Bride     |
| D088 | F | 33 | [30-40[ | Secondary school | Household      | Bride     |
| D089 | M | 34 | [30-40[ | Secondary school | Private sector | Bride     |
| D090 | M | 58 | [50-60[ | Secondary school | Private sector | Bride     |

|      |   |    |         |                  |                |           |
|------|---|----|---------|------------------|----------------|-----------|
| D091 | M | 54 | [50-60[ | Secondary school | Civil servant  | Bride     |
| D092 | M | 49 | [40-50[ | Secondary school | Private sector | Bride     |
| D093 | M | 48 | [40-50[ | Secondary school | Private sector | Bride     |
| D094 | M | 52 | [50-60[ | Secondary school | Private sector | Bride     |
| D095 | F | 34 | [30-40[ | Secondary school | Household      | Bride     |
| D096 | F | 29 | [20-30[ | Higher education | Private sector | Bachelor  |
| D097 | M | 25 | [20-30[ | Higher education | Student        | Bachelor  |
| D098 | F | 55 | [50-60[ | Secondary school | Civil servant  | Bride     |
| D099 | M | 41 | [40-50[ | Primary school   | Private sector | Bachelor  |
| D100 | F | 48 | [40-50[ | Secondary school | Household      | Bachelor  |
| D101 | F | 42 | [40-50[ | Secondary school | Household      | Bride     |
| D102 | F | 45 | [40-50[ | Secondary school | Private sector | Bride     |
| D103 | F | 23 | [20-30[ | Secondary school | Student        | Bachelor  |
| D104 | M | 47 | [40-50[ | Secondary school | Civil servant  | Bride     |
| D105 | M | 15 | <20     | Secondary school | Student        | Bachelor  |
| D106 | F | 68 | ≥60     | Primary school   | Jobless        | Bachelor  |
| D107 | M | 39 | [30-40[ | Secondary school | Private sector | Bride     |
| D108 | M | 47 | [40-50[ | Secondary school | Private sector | Bride     |
| D109 | F | 36 | [30-40[ | Secondary school | Private sector | Bachelor  |
| D110 | M | 45 | [40-50[ | Secondary school | Civil servant  | Bride     |
| D111 | F | 42 | [40-50[ | Secondary school | Private sector | Widow(er) |
| D112 | F | 20 | [20-30[ | Secondary school | Civil servant  | Bride     |
| D113 | F | 23 | [20-30[ | Secondary school | Private sector | Bride     |
| D114 | M | 47 | [40-50[ | Primary school   | Private sector | Bride     |
| D115 | M | 20 | [20-30[ | Higher education | Private sector | Bride     |
| D116 | F | 68 | ≥60     | Secondary school | Civil servant  | Bride     |
| D117 | M | 39 | [30-40[ | Primary school   | Private sector | Bride     |
| D118 | M | 47 | [40-50[ | Secondary school | Civil servant  | Bride     |
| D119 | F | 36 | [30-40[ | Higher education | Private sector | Bride     |



|      |   |    |         |                  |                |           |
|------|---|----|---------|------------------|----------------|-----------|
| D120 | M | 32 | [30-40[ | Secondary school | Civil servant  | Bachelor  |
| D121 | F | 80 | ≥60     | Secondary school | Private sector | Bachelor  |
| D122 | F | 53 | [50-60[ | Primary school   | Private sector | Bride     |
| D123 | F | 29 | [20-30[ | Secondary school | Private sector | Bride     |
| D124 | M | 66 | ≥60     | Secondary school | Private sector | Bride     |
| D125 | M | 71 | ≥60     | Secondary school | Private sector | Bride     |
| D126 | M | 42 | [40-50[ | Secondary school | Private sector | Bachelor  |
| D127 | F | 28 | [20-30[ | Secondary school | Private sector | Bachelor  |
| D128 | M | 33 | [30-40[ | Secondary school | Private sector | Bride     |
| D129 | F | 72 | ≥60     | Primary school   | Private sector | Bachelor  |
| D130 | F | 60 | ≥60     | Secondary school | Private sector | Widow(er) |
| D131 | F | 70 | ≥60     | Secondary school | Civil servant  | Bride     |
| D132 | M | 29 | [20-30[ | Secondary school | Private sector | Bride     |
| D133 | F | 35 | [30-40[ | Secondary school | Private sector | Bride     |
| D134 | M | 46 | [40-50[ | Analphabet       | Private sector | Bachelor  |
| D135 | M | 39 | [30-40[ | Secondary school | Private sector | Widow(er) |
| D136 | F | 65 | ≥60     | Secondary school | Private sector | Bride     |
| D137 | M | 44 | [40-50[ | Primary school   | Private sector | Bride     |
| D138 | F | 65 | ≥60     | Analphabet       | Private sector | Bride     |
| D139 | F | 44 | [40-50[ | Secondary school | Private sector | Widow(er) |
| D140 | F | 64 | ≥60     | Secondary school | Civil servant  | Bride     |
| D141 | F | 56 | [50-60[ | Secondary school | Civil servant  | Bride     |
| D142 | F | 66 | ≥60     | Analphabet       | Private sector | Bride     |
| D143 | M | 34 | [30-40[ | Primary school   | Private sector | Widow(er) |
| D144 | F | 58 | [50-60[ | Primary school   | Private sector | Widow(er) |
| D145 | F | 54 | [50-60[ | Secondary school | Private sector | Bachelor  |
| D146 | F | 48 | [40-50[ | Higher education | Civil servant  | Bachelor  |
| D147 | M | 52 | [50-60[ | Secondary school | Civil servant  | Bride     |
| D148 | M | 34 | [30-40[ | Secondary school | Jobless        | Bride     |

|      |   |    |         |                  |                |           |
|------|---|----|---------|------------------|----------------|-----------|
| D149 | F | 29 | [20-30[ | Higher education | Jobless        | Bachelor  |
| D150 | F | 38 | [30-40[ | Secondary school | Jobless        | Bride     |
| D151 | F | 36 | [30-40[ | Higher education | Civil servant  | Bride     |
| D152 | M | 10 | <20     | Primary school   | Student        | Bachelor  |
| D153 | M | 28 | [20-30[ | Secondary school | Civil servant  | Bachelor  |
| D154 | F | 22 | [20-30[ | Secondary school | Student        | Bachelor  |
| D155 | F | 38 | [30-40[ | Primary school   | Household      | Bachelor  |
| D156 | F | 20 | [20-30[ | Secondary school | Student        | Bachelor  |
| D157 | M | 35 | [30-40[ | Secondary school | Private sector | Bride     |
| D158 | F | 40 | [40-50[ | Higher education | Civil servant  | Bride     |
| D159 | F | 53 | [50-60[ | Primary school   | Household      | Bride     |
| D160 | F | 45 | [40-50[ | Higher education | Civil servant  | Bride     |
| D161 | F | 36 | [30-40[ | Higher education | Household      | Bachelor  |
| D162 | M | 63 | ≥60     | Primary school   | Civil servant  | Bride     |
| D163 | F | 22 | [20-30[ | Secondary school | Student        | Bachelor  |
| D164 | F | 38 | [30-40[ | Higher education | Civil servant  | Bride     |
| D165 | M | 57 | [50-60[ | Secondary school | Private sector | Bride     |
| D166 | F | 20 | [20-30[ | Higher education | Student        | Bachelor  |
| D167 | F | 54 | [50-60[ | Secondary school | Household      | Bride     |
| D168 | F | 27 | [20-30[ | Higher education | Student        | Bachelor  |
| D169 | F | 25 | [20-30[ | Secondary school | Household      | Bride     |
| D170 | F | 58 | [50-60[ | Secondary school | Household      | Bride     |
| D171 | M | 27 | [20-30[ | Higher education | Student        | Bachelor  |
| D172 | F | 66 | ≥60     | Secondary school | Household      | Bride     |
| D173 | M | 10 | <20     | Primary school   | Student        | Bachelor  |
| D174 | F | 37 | [30-40[ | Secondary school | Household      | Bride     |
| D175 | F | 78 | ≥60     | Analphabet       | Household      | Widow(er) |
| D176 | M | 63 | ≥60     | Secondary school | Private sector | Bride     |
| D177 | M | 43 | [40-50[ | Primary school   | Private sector | Bride     |

|                                                                                          |   |    |         |                  |                |           |
|------------------------------------------------------------------------------------------|---|----|---------|------------------|----------------|-----------|
| D178                                                                                     | F | 63 | ≥60     | Primary school   | Household      | Bride     |
| D179                                                                                     | M | 52 | [50-60[ | Secondary school | Civil servant  | Bride     |
| D180                                                                                     | F | 23 | [20-30[ | Secondary school | Student        | Bachelor  |
| D181                                                                                     | M | 42 | [40-50[ | Secondary school | Private sector | Bride     |
| D182                                                                                     | F | 23 | [20-30[ | Higher education | Student        | Bachelor  |
| D183                                                                                     | F | 54 | [50-60[ | Secondary school | Household      | Bride     |
| D184                                                                                     | F | 31 | [30-40[ | Secondary school | Household      | Bachelor  |
| D185                                                                                     | M | 44 | [40-50[ | Secondary school | Civil servant  | Bride     |
| D186                                                                                     | M | 43 | [40-50[ | Secondary school | Private sector | Bride     |
| D187                                                                                     | M | 40 | [40-50[ | Secondary school | Private sector | Bride     |
| D188                                                                                     | M | 47 | [40-50[ | Higher education | Civil servant  | Bride     |
| D189                                                                                     | M | 10 | <20     | Primary school   | Student        | Bachelor  |
| D190                                                                                     | M | 41 | [40-50[ | Secondary school | Private sector | Bride     |
| D191                                                                                     | M | 37 | [30-40[ | Higher education | Civil servant  | Bride     |
| D192                                                                                     | F | 17 | <20     | Secondary school | Student        | Bachelor  |
| D193                                                                                     | F | 30 | [30-40[ | Secondary school | Household      | Bachelor  |
| D194                                                                                     | F | 38 | [30-40[ | Higher education | Private sector | Bachelor  |
| D195                                                                                     | M | 30 | [30-40[ | Secondary school | Private sector | Bachelor  |
| D196                                                                                     | F | 33 | [30-40[ | Secondary school | Household      | Bride     |
| D197                                                                                     | F | 84 | ≥60     | Analphabet       | Household      | Widow(er) |
| D198                                                                                     | F | 38 | [30-40[ | Secondary school | Private sector | Bachelor  |
| D199                                                                                     | M | 48 | [40-50[ | Higher education | Private sector | Bride     |
| D200                                                                                     | F | 39 | [30-40[ | Primary school   | Household      | Bride     |
| Legend: M, male; F, female; code with K, cancer patient; code with D, non-cancer patient |   |    |         |                  |                |           |

## S2. Patients and cancer treatments

| Patients     | Cancer, features, and treatment status |                           |               |                |            |                |                                 |                      |           |                 |               |           |           |         |       |          |
|--------------|----------------------------------------|---------------------------|---------------|----------------|------------|----------------|---------------------------------|----------------------|-----------|-----------------|---------------|-----------|-----------|---------|-------|----------|
| Patient Code | Cancer status                          | Location of the pathology | Cancer stage  | Classification | From when? | Chemo-therapy? | Number of chemotherapy sessions | Type of Chemotherapy | Diarr-hea | Abdo-minal pain | Consti-pation | Vomi-ting | Head-ache | Nau-sea | Fever | Asthenia |
| K001         | Yes                                    | Cavum                     | Stage 3       | Lymph nodes    | 6 Months   | No             |                                 |                      | No        | Yes             | Yes           | No        | Yes       | Yes     | Yes   | Yes      |
| K002         | Yes                                    | Prostate                  | Stage 4       | Metastasis     | >12 Months | No             |                                 |                      | No        | Yes             | Yes           | Yes       | No        | Yes     | No    | Yes      |
| K003         | Yes                                    | Breast                    | Stage 4       | Metastasis     | 12 Months  | Yes            | More than 6 times               | Adjuvant             | Yes       | Yes             | No            | No        | No        | No      | Yes   | Yes      |
| K004         | Yes                                    | Pancreas                  | Stage 4       | Metastasis     | >12 Months | Yes            | Less than 4 times               | neo-Adjuvant         | Yes       | Yes             | No            | No        | No        | Yes     | Yes   | Yes      |
| K005         | Yes                                    | Colorectal                | Stage 4       | Metastasis     | >12 Months | Yes            | More than 6 times               | Adjuvant             | Yes       | Yes             | No            | No        | Yes       | No      | Yes   | Yes      |
| K006         | Yes                                    | Liver                     | Stage 4       | Metastasis     | 12 Months  | No             |                                 |                      | No        | Yes             | Yes           | No        | Yes       | Yes     | Yes   | Yes      |
| K007         | Yes                                    | Cervical                  | Stage 3       | Lymph nodes    | 6 Months   | No             |                                 |                      | No        | Yes             | Yes           | Yes       | No        | Yes     | No    | No       |
| K008         | Yes                                    | Kaposi sarcoma            | Unknwon stage |                | 12 Months  | No             |                                 |                      | No        | Yes             | Yes           | No        | Yes       | No      | No    | Yes      |
| K009         | Yes                                    | Breast                    | Stage 3       | Lymph nodes    | 12 Months  | Yes            | Less than 4 times               | Exclusive            | No        | Yes             | Yes           | No        | No        | No      | No    | No       |
| K010         | Yes                                    | Leukemia                  | Stage 4       | Metastasis     | 12 Months  | No             |                                 |                      | No        | Yes             | Yes           | No        | No        | Yes     | No    | No       |
| K011         | Yes                                    | Breast                    | Stage 3       | Lymph nodes    | 12 Months  | No             |                                 |                      | Yes       | Yes             | Yes           | No        | Yes       | No      | No    | Yes      |
| K012         | Yes                                    | Lung                      | Stage 4       | Metastasis     | >12 Months | Yes            | Less than 4 times               | Palliative           | No        | Yes             | Yes           | No        | No        | Yes     | Yes   | Yes      |
| K013         | Yes                                    | Breast                    | Stage 4       | Metastasis     | >12 Months | Yes            | Less than 4 times               | Exclusive            | Yes       | Yes             | No            | No        | No        | No      | Yes   | Yes      |
| K014         | Yes                                    | Osteosarcoma              | Stage 4       | Metastasis     | 6 Months   | No             |                                 |                      | No        | Yes             | Yes           | No        | No        | Yes     | Yes   | Yes      |
| K015         | Yes                                    | Breast                    | Stage 3       | Lymph nodes    | 12 Months  | Yes            | More than 6 times               | Exclusive            | No        | No              | Yes           | No        | No        | No      | No    | Yes      |
| K016         | Yes                                    | Liver                     | Unknwon stage |                | 6 Months   | No             |                                 |                      | No        | Yes             | Yes           | No        | No        | Yes     | No    | Yes      |
| K017         | Yes                                    | Osteosarcoma              | Stage 4       | Metastasis     | >12 Months | Yes            | Less than 4 times               | Exclusive            | No        | Yes             | Yes           | No        | No        | No      | No    | Yes      |
| K018         | Yes                                    | Lung                      | Stage 4       | Metastasis     | 12 Months  | Yes            | More than 6 times               | Palliative           | No        | No              | Yes           | No        | Yes       | Yes     | No    | Yes      |
| K019         | Yes                                    | Cholangiocarcinoma        | Stage 4       | Metastasis     | 6 Months   | No             |                                 |                      | No        | Yes             | Yes           | No        | No        | Yes     | Yes   | Yes      |
| K020         | Yes                                    | Cavum                     | Stage 3       | Lymph nodes    | 6 Months   | Yes            | Less than 4 times               | Adjuvant             | No        | No              | Yes           | No        | No        | No      | No    | No       |

|      |     |                    |               |             |            |     |                   |              |     |     |     |     |     |     |     |     |
|------|-----|--------------------|---------------|-------------|------------|-----|-------------------|--------------|-----|-----|-----|-----|-----|-----|-----|-----|
| K021 | Yes | Liver              | Stage 3       | Lymph nodes | 6 Months   | No  |                   |              | No  | Yes | Yes | No  | No  | No  | Yes | No  |
| K022 | Yes | Colorectal         | Stage 3       | Lymph nodes | 6 Months   | Yes | Less than 4 times | neo-Adjuvant | No  | Yes | Yes | No  | No  | No  | Yes | No  |
| K023 | Yes | Lung               | Stage 3       | Metastasis  | 12 Months  | Yes | Less than 4 times | Exclusive    | Yes | Yes | Yes | Yes | Yes | Yes | Yes | Yes |
| K024 | Yes | Liver              | Unknwon stage |             | 6 Months   | No  |                   |              | Yes | Yes | No  | No  | No  | Yes | Yes | Yes |
| K025 | Yes | Leukemia           | Unknwon stage |             | 6 Months   | No  |                   |              | No  | No  | No  | No  | No  | No  | No  | Yes |
| K026 | Yes | Leukemia           | Unknwon stage |             | 6 Months   | Yes | Less than 4 times | Exclusive    | No  | Yes | Yes | No  | No  | Yes | Yes | Yes |
| K027 | Yes | Prostate           | Stage 3       | Lymph nodes | 12 Months  | No  |                   |              | No  | Yes | Yes | No  | No  | Yes | Yes | Yes |
| K028 | Yes | Colorectal         | Stage 3       | Lymph nodes | 6 Months   | No  |                   |              | No  | Yes | Yes | No  | Yes | Yes | No  | Yes |
| K029 | Yes | Liver              | Stage 3       | Lymph nodes | 6 Months   | No  |                   |              | Yes | Yes | No  | Yes | Yes | Yes | Yes | Yes |
| K030 | Yes | Leukemia           | Unknwon stage |             | 6 Months   | No  |                   |              | No  | No  | Yes | No  | No  | No  | Yes | Yes |
| K031 | Yes | Pancreas           | Stage 3       | Lymph nodes | 12 Months  | No  |                   |              | No  | Yes | Yes | No  | No  | Yes | Yes | Yes |
| K032 | Yes | Breast             | Stage 4       | Metastasis  | >12 Months | No  |                   |              | No  | Yes | Yes | No  | Yes | Yes | Yes | Yes |
| K033 | Yes | Breast             | Stage 4       | Metastasis  | 6 Months   | No  |                   |              | No  | Yes | Yes | No  | No  | Yes | No  | Yes |
| K034 | Yes | Pancreas           | Stage 3       | Lymph nodes | 12 Months  | No  |                   |              | No  | Yes | No  | No  | No  | No  | Yes | Yes |
| K035 | Yes | Osteosarcoma       | Stage 3       | Lymph nodes | 12 Months  | Yes | Less than 4 times | Adjuvant     | No  | No  | Yes | No  | No  | No  | No  | Yes |
| K036 | Yes | Breast             | Stage 4       | Metastasis  | >12 Months | Yes | Less than 4 times | Adjuvant     | No  | Yes | Yes | No  | Yes | Yes | Yes | Yes |
| K037 | Yes | Breast             | Stage 3       | Lymph nodes | >12 Months | Yes | More than 6 times | neo-Adjuvant | Yes | Yes | Yes | Yes | No  | Yes | No  | Yes |
| K038 | Yes | Cholangiocarcinoma | Stage 4       | Metastasis  | >12 Months | Yes | More than 6 times | Palliative   | No  | No  | Yes | Yes | No  | Yes | Yes | Yes |
| K039 | Yes | Prostate           | Stage 4       | Metastasis  | >12 Months | No  |                   |              | Yes | Yes | No  | No  | No  | No  | Yes | Yes |
| K040 | Yes | Prostate           | Stage 4       | Metastasis  | >12 Months | No  |                   |              | No  | Yes | Yes | No  | No  | No  | No  | Yes |
| K041 | Yes | Prostate           | Stage 4       | Metastasis  | >12 Months | No  |                   |              | No  | Yes | Yes | No  | No  | No  | No  | Yes |
| K042 | Yes | Cervical           | Unknwon stage |             | 6 Months   | No  |                   |              | Yes | Yes | No  | No  | No  | No  | Yes | Yes |
| K043 | Yes | Cervical           | Stage 3       | Lymph nodes | 12 Months  | No  |                   |              | No  | Yes | Yes | No  | No  | No  | No  | No  |
| K044 | Yes | Breast             | Stage 4       | Metastasis  | >12 Months | No  |                   |              | No  | Yes | Yes | No  | No  | No  | Yes | Yes |
| K045 | Yes | Osteosarcoma       | Stage 4       | Metastasis  | 6 Months   | No  |                   |              | No  | Yes | Yes | No  | No  | No  | Yes | Yes |
| K046 | Yes | Cervical           | Stage 3       | Lymph nodes | >12 Months | Yes | More than 6 times | Exclusive    | No  | Yes | Yes | No  | No  | No  | No  | No  |
| K047 | Yes | Kaposi sarcoma     | Unknwon stage |             | 12 Months  | Yes | Less than 4 times | Exclusive    | No  | Yes | Yes | No  | No  | No  | No  | No  |

|      |     |                    |               |             |            |     |                   |              |     |     |     |     |     |     |     |     |
|------|-----|--------------------|---------------|-------------|------------|-----|-------------------|--------------|-----|-----|-----|-----|-----|-----|-----|-----|
| K048 | Yes | Breast             | Stage 3       | Lymph nodes | >12 Months | Yes | More than 6 times | Adjuvant     | No  | No  | Yes | No  | No  | Yes | No  | No  |
| K049 | Yes | Breast             | Stage 4       | Metastasis  | >12 Months | No  |                   |              | No  | Yes | Yes | No  | No  | Yes | Yes | Yes |
| K050 | Yes | Leukemia           | Stage 4       | Metastasis  | >12 Months | No  |                   |              | No  | Yes | Yes | No  | No  | No  | No  | Yes |
| K051 | Yes | Cholangiocarcinoma | Stage 4       | Metastasis  | 6 Months   | No  |                   |              | No  | Yes | Yes | No  | No  | No  | No  | Yes |
| K052 | Yes | Breast             | Stage 4       | Metastasis  | >12 Months | No  |                   |              | No  | No  | No  | No  | No  | No  | No  | No  |
| K053 | Yes | Cervical           | Stage 3       | Lymph nodes | 6 Months   | No  |                   |              | No  | Yes | Yes | No  | No  | Yes | Yes | Yes |
| K054 | Yes | Cervical           | Stage 4       | Metastasis  | >12 Months | No  |                   |              | No  | Yes | Yes | No  | No  | No  | Yes | Yes |
| K055 | Yes | Osteosarcoma       | Stage 4       | Metastasis  | >12 Months | Yes |                   | Adjuvant     | No  | Yes | Yes | No  | No  | Yes | Yes | Yes |
| K056 | Yes | Breast             | Stage 4       | Metastasis  | >12 Months | Yes |                   | Adjuvant     | No  | No  | Yes | No  | Yes | Yes | Yes | Yes |
| K057 | Yes | Lung               | Stage 4       | Metastasis  | 12 Months  | Yes | Less than 4 times | Exclusive    | No  | No  | Yes | Yes | Yes | Yes | Yes | Yes |
| K058 | Yes | Breast             | Stage 4       | Metastasis  | >12 Months | Yes | More than 6 times | Palliative   | No  | Yes | Yes | No  | No  | No  | Yes | Yes |
| K059 | Yes | Colorectal         | Stage 3       | Lymph nodes | 6 Months   | No  |                   |              | No  | Yes | Yes | No  | No  | Yes | Yes | Yes |
| K060 | Yes | Breast             | Stage 4       | Metastasis  | 12 Months  | Yes | More than 6 times | Adjuvant     | Yes | Yes | No  | No  | No  | Yes | Yes | Yes |
| K061 | Yes | Breast             | Stage 4       | Metastasis  | 12 Months  | No  |                   |              | No  | Yes | Yes | No  | Yes | Yes | Yes | Yes |
| K062 | Yes | Stomach            | Stage 3       | Lymph nodes | 12 Months  | No  |                   |              | No  | Yes | Yes | Yes | Yes | Yes | Yes | Yes |
| K063 | Yes | Leukemia           | Stage 4       | Metastasis  | >12 Months | Yes | More than 6 times | Exclusive    | No  | No  | No  | No  | No  | No  | No  | Yes |
| K064 | Yes | Cervical           | Stage 4       | Metastasis  | >12 Months | Yes | More than 6 times | Exclusive    | No  | Yes | Yes | No  | No  | Yes | Yes | Yes |
| K065 | Yes | Prostate           | Unknwon stage |             | 12 Months  | No  |                   |              | No  | Yes | Yes | Yes | Yes | Yes | Yes | Yes |
| K066 | Yes | Leukemia           | Stage 3       | Lymph nodes | 12 Months  | Yes | More than 6 times | Exclusive    | No  | No  | Yes | No  | No  | No  | No  | No  |
| K067 | Yes | Liver              | Stage 4       | Metastasis  | >12 Months | No  |                   |              | No  | Yes | Yes | Yes | Yes | Yes | Yes | Yes |
| K068 | Yes | Colorectal         | Stage 3       | Lymph nodes | 12 Months  | Yes | More than 6 times | neo-Adjuvant | No  | Yes | Yes | Yes | Yes | Yes | No  | Yes |
| K069 | Yes | Liver              | Stage 4       | Metastasis  | 12 Months  | No  |                   |              | No  | Yes | Yes | No  | No  | No  | No  | Yes |
| K070 | Yes | Liver              | Stage 4       | Metastasis  | 12 Months  | No  |                   |              | Yes | No  | No  | Yes | No  | No  | Yes | Yes |
| K071 | Yes | Osteosarcoma       | Stage 4       | Metastasis  | 12 Months  | No  |                   |              | No  | Yes | Yes | No  | No  | No  | No  | Yes |
| K072 | Yes | Cervical           | Stage 4       | Metastasis  | 12 Months  | No  |                   |              | No  | Yes | Yes | No  | No  | No  | Yes | Yes |
| K073 | Yes | Leukemia           | Stage 4       | Metastasis  | 12 Months  | No  |                   |              | No  | Yes | Yes | No  | No  | No  | No  | Yes |
| K074 | Yes | Colorectal         | Stage 4       | Metastasis  | 12 Months  | No  |                   |              | No  | Yes | Yes | No  | Yes | No  | Yes | Yes |

|      |     |                |               |             |            |     |                   |              |     |     |     |     |     |     |     |     |
|------|-----|----------------|---------------|-------------|------------|-----|-------------------|--------------|-----|-----|-----|-----|-----|-----|-----|-----|
| K075 | Yes | Breast         | Stage 4       | Metastasis  | >12 Months | Yes | More than 6 times | Adjuvant     | Yes | Yes | Yes | No  | No  | Yes | No  | Yes |
| K076 | Yes | Breast         | Stage 4       | Metastasis  | >12 Months | No  | Less than 4 times | Adjuvant     | No  | Yes | Yes | No  | Yes | Yes | Yes | Yes |
| K077 | Yes | Kaposi sarcoma | Stage 4       | Metastasis  | 12 Months  | Yes | More than 6 times | Exclusive    | Yes | Yes | No  | No  | No  | Yes | Yes | Yes |
| K078 | Yes | Stomach        | Stage 3       | Lymph nodes | 12 Months  | No  |                   |              | No  | Yes | Yes | Yes | Yes | Yes | Yes | Yes |
| K079 | Yes | Breast         | Stage 4       | Metastasis  | >12 Months | Yes | Less than 4 times | neo-Adjuvant | No  | Yes | Yes | No  | No  | No  | No  | No  |
| K080 | Yes | Cervical       | Unknwon stage |             | 6 Months   | Yes | Less than 4 times | Exclusive    | No  | No  | Yes | No  | No  | No  | No  | No  |
| K081 | Yes | Cervical       | Stage 4       | Metastasis  | >12 Months | No  |                   |              | Yes | No  | No  | No  | No  | No  | No  | Yes |
| K082 | Yes | Colorectal     | Stage 3       | Lymph nodes | >12 Months | No  |                   |              | No  | No  | Yes | No  | No  | No  | No  | Yes |
| K083 | Yes | Breast         | Stage 3       | Lymph nodes | >12 Months | Yes | More than 6 times | neo-Adjuvant | No  | Yes | Yes | No  | No  | No  | Yes | Yes |
| K084 | Yes | Pancreas       | Unknwon stage |             | 6 Months   | Yes | Less than 4 times | neo-Adjuvant | No  | Yes | Yes | No  | No  | No  | No  | Yes |
| K085 | Yes | Breast         | Stage 4       | Metastasis  | >12 Months | No  |                   |              | No  | Yes | Yes | No  | No  | Yes | No  | No  |
| K086 | Yes | Prostate       | Stage 4       | Metastasis  | >12 Months | No  |                   |              | No  | Yes | Yes | No  | No  | No  | Yes | Yes |
| K087 | Yes | Leukemia       | Stage 3       | Lymph nodes | 12 Months  | Yes | Less than 4 times | Exclusive    | No  | No  | No  | No  | No  | No  | No  | No  |
| K088 | Yes | Breast         | Stage 3       | Lymph nodes | >12 Months | Yes | More than 6 times | Adjuvant     | No  | No  | No  | No  | No  | No  | No  | No  |
| K089 | Yes | Prostate       | Stage 4       | Metastasis  | >12 Months | No  |                   |              | No  | Yes | Yes | No  | No  | No  | No  | Yes |
| K090 | Yes | Leukemia       | Unknwon stage |             | >12 Months | No  |                   |              | No  | Yes | Yes | No  | No  | Yes | Yes | Yes |
| K091 | Yes | Colorectal     | Stage 3       | Lymph nodes | 12 Months  | No  |                   |              | Yes | Yes | No  | No  | No  | Yes | Yes | Yes |
| K092 | Yes | Breast         | Stage 3       | Lymph nodes | >12 Months | No  |                   |              | No  | Yes | No  | No  | No  | No  | No  | No  |
| K093 | Yes | Cervical       | Stage 3       | Lymph nodes | 12 Months  | Yes | Less than 4 times | neo-Adjuvant | No  | Yes | Yes | No  | No  | No  | No  | No  |
| K094 | Yes | Cavum          | Unknwon stage |             | 6 Months   | No  |                   |              | No  | No  | Yes | No  | No  | No  | No  | No  |
| K095 | Yes | Cervical       | Unknwon stage |             | 12 Months  | Yes | More than 6 times | Adjuvant     | No  | Yes | Yes | No  | No  | No  | Yes | Yes |
| K096 | Yes | Leukemia       | Stage 3       | Lymph nodes | 12 Months  | Yes | More than 6 times | Exclusive    | Yes | Yes | No  | No  | No  | No  | No  | Yes |
| K097 | Yes | Breast         | Stage 3       | Lymph nodes | 12 Months  | Yes | Less than 4 times | neo-Adjuvant | No  | No  | No  | No  | No  | No  | No  | No  |
| K098 | Yes | Leukemia       | Unknwon stage |             | 12 Months  | Yes | More than 6 times | Exclusive    | Yes | Yes | No  | No  | Yes | Yes | Yes | Yes |
| K099 | Yes | Leukemia       | Stage 4       | Metastasis  | >12 Months | Yes | Less than 4 times | Exclusive    | Yes | Yes | No  | No  | Yes | Yes | Yes | Yes |

|      |     |                    |               |             |            |     |                   |              |     |     |     |     |     |     |     |     |
|------|-----|--------------------|---------------|-------------|------------|-----|-------------------|--------------|-----|-----|-----|-----|-----|-----|-----|-----|
| K100 | Yes | Cervical           | Stage 4       | Metastasis  | 12 Months  | Yes | More than 6 times | Palliative   | No  | No  | Yes | No  | No  | No  | Yes | Yes |
| K101 | Yes | Kaposi sarcoma     | Unknwon stage |             | 12 Months  | Yes | Less than 4 times | Exclusive    | No  | Yes | Yes | No  | No  | No  | No  | No  |
| K102 | Yes | Cholangiocarcinoma | Unknwon stage |             | 6 Months   | Yes | More than 6 times | Exclusive    | Yes | No  | No  | No  | No  | No  | No  | Yes |
| K103 | Yes | Colorectal         | Stage 2       | Lymph nodes | 12 Months  | Yes | Less than 4 times | neo-Adjuvant | No  | No  | Yes | No  | No  | No  | No  | Yes |
| K104 | Yes | Colorectal         | Stage 4       | Metastasis  | >12 Months | No  |                   |              | Yes | Yes | Yes | No  | No  | No  | No  | Yes |
| K105 | Yes | Breast             | Stage 4       | Metastasis  | >12 Months | Yes | More than 6 times | neo-Adjuvant | No  | No  | No  | No  | No  | No  | No  | No  |
| K106 | Yes | Breast             | Stage 4       | Metastasis  | >12 Months | Yes | More than 6 times | Palliative   | No  | Yes | Yes | No  | Yes | No  | No  | Yes |
| K107 | Yes | Leukemia           | Unknwon stage |             | 12 Months  | Yes | More than 6 times | Palliative   | No  | Yes | No  | No  | No  | No  | No  | No  |
| K108 | Yes | Colorectal         | Stage 3       | Lymph nodes | 12 Months  | Yes | Less than 4 times | Adjuvant     | No  | Yes | No  | No  | No  | No  | No  | No  |
| K109 | Yes | Breast             | Stage 4       | Metastasis  | >12 Months | Yes | More than 6 times | Adjuvant     | No  | No  | Yes | Yes | Yes | Yes | Yes | Yes |
| K110 | Yes | Breast             | Stage 3       | Lymph nodes | 12 Months  | Yes | Less than 4 times | neo-Adjuvant | Yes | Yes | No  | No  | No  | No  | No  | Yes |
| K111 | Yes | Osteosarcoma       | Unknwon stage |             | 12 Months  | Yes | More than 6 times | Exclusive    | Yes | No  | nn  | No  | No  | No  | No  | No  |
| K112 | Yes | Breast             | Stage 3       | Lymph nodes | 12 Months  | Yes | Less than 4 times | neo-Adjuvant | No  | Yes | Yes | No  | Yes | Yes | Yes | Yes |
| K113 | Yes | Breast             | Stage 3       | Lymph nodes |            | Yes | Less than 4 times | Exclusive    | No  | Yes | Yes | No  | No  | No  | No  | No  |
| K114 | Yes | Breast             | Stage 3       | Lymph nodes | 12 Months  | Yes | Less than 4 times | Adjuvant     | No  | Yes | Yes | No  | No  | No  | No  | No  |
| K115 | Yes | Cervical           | Stage 3       | Lymph nodes | 12 Months  | Yes | Less than 4 times | Exclusive    | No  | Yes | Yes | No  | No  | No  | No  | No  |
| K116 | Yes | Breast             | Stage 3       | Lymph nodes | 12 Months  | Yes | Less than 4 times | neo-Adjuvant | No  | No  | Yes | Yes | Yes | Yes | Yes | Yes |
| K117 | Yes | Stomach            | Unknwon stage |             | 12 Months  | Yes | Less than 4 times | neo-Adjuvant | Yes | No  | No  | No  | No  | No  | Yes | Yes |
| K118 | Yes | Prostate           | Stage 4       | Metastasis  | >12 Months | Yes | More than 6 times | Exclusive    | No  | Yes | Yes | No  | No  | No  | No  | No  |
| K119 | Yes | Cervical           | Stage 3       | Lymph nodes | >12 Months | Yes | More than 6 times | Adjuvant     | Yes | Yes | No  | Yes | Yes | No  | Yes | Yes |
| K120 | Yes | Stomach            | Stage 4       | Metastasis  | >12 Months | Yes | More than 6 times | Exclusive    | Yes | Yes | No  | Yes | Yes | No  | Yes | Yes |
| K121 | Yes | Breast             | Stage 3       | Lymph nodes | 12 Months  | Yes | More than 6 times | neo-Adjuvant | Yes | Yes | No  | Yes | Yes | Yes | Yes | Yes |
| K122 | Yes | Leukemia           | Unknwon stage |             | >12 Months | Yes | Less than 4 times | Exclusive    | No  | No  | Yes | No  | No  | No  | No  | Yes |
| K123 | Yes | Breast             | Stage 3       | Lymph nodes | 12 Months  | Yes | Less than 4 times | Adjuvant     | No  | Yes | Yes | No  | No  | No  | No  | No  |



|      |     |                    |               |             |            |     |                   |              |     |     |     |     |     |     |     |     |
|------|-----|--------------------|---------------|-------------|------------|-----|-------------------|--------------|-----|-----|-----|-----|-----|-----|-----|-----|
| K124 | Yes | Stomach            | Unknwon stage |             | 12 Months  | Yes | Less than 4 times | Adjuvant     | No  | No  | Yes | No  | No  | No  | No  | No  |
| K125 | Yes | Cervical           | Stage 3       | Lymph nodes | 12 Months  | Yes | Less than 4 times | Exclusive    | No  | No  | No  | No  | No  | No  | No  | No  |
| K126 | Yes | Breast             | Stage 4       | Metastasis  | >12 Months | Yes | Less than 4 times | neo-Adjuvant | No  | Yes | Yes | No  | No  | No  | No  | No  |
| K127 | Yes | Breast             | Unknwon stage |             | >12 Months | Yes | More than 6 times | neo-Adjuvant | No  | Yes | Yes | No  | Yes | No  | Yes | No  |
| K128 | Yes | Breast             | Stage 3       | Lymph nodes | >12 Months | Yes | Less than 4 times | neo-Adjuvant | No  | Yes | Yes | No  | No  | No  | No  | No  |
| K129 | Yes | Breast             | Stage 3       | Lymph nodes | >12 Months | Yes | Less than 4 times | neo-Adjuvant | Yes | Yes | Yes | No  | No  | No  | Yes | Yes |
| K130 | Yes | Cervical           | Stage 4       | Metastasis  | 6 Months   | No  |                   |              | No  | Yes | Yes | No  | Yes | Yes | Yes | Yes |
| K131 | Yes | Breast             | Stage 4       | Metastasis  | >12 Months | No  |                   |              | No  | No  | Yes | No  | No  | No  | No  | Yes |
| K132 | Yes | Cervical           | Stage 4       | Metastasis  | >12 Months | No  |                   |              | No  | Yes | Yes | Yes | Yes | Yes | Yes | Yes |
| K133 | Yes | Breast             | Stage 3       | Lymph nodes | 6 Months   | No  |                   |              | Yes | Yes | No  | Yes | Yes | Yes | Yes | Yes |
| K134 | Yes | Cholangiocarcinoma | Stage 4       | Metastasis  | 6 Months   | No  |                   |              | No  | No  | Yes | No  | No  | Yes | No  | Yes |
| K135 | Yes | Stomach            | Stage 4       | Metastasis  | >12 Months | No  |                   |              | Yes | No  | No  | No  | Yes | No  | Yes | No  |
| K136 | Yes | Colorectal         | Stage 4       | Metastasis  | >12 Months | No  |                   |              | No  | Yes | Yes | No  | Yes | Yes | Yes | Yes |
| K137 | Yes | Leukemia           | Stage 4       | Metastasis  | 6 Months   | Yes | Less than 4 times | Exclusive    | Yes | Yes | No  | No  | No  | No  | No  | Yes |
| K138 | Yes | Stomach            | Stage 3       | Lymph nodes | 12 Months  | Yes | More than times   | Exclusive    | No  | Yes | Yes | No  | No  | No  | No  | No  |
| K139 | Yes | Leukemia           | Stage 4       | Metastasis  | 12 Months  | Yes | More than 6 times | Exclusive    | Yes | Yes | No  | Yes | Yes | Yes | Yes | Yes |
| K140 | Yes | Pancreas           | Stage 4       | Metastasis  | >12 Months | Yes | Less than 4 times | Palliative   | No  | Yes | Yes | No  | No  | No  | No  | No  |
| K141 | Yes | Kaposi sarcoma     | Stage 3       | Lymph nodes | 12 Months  | Yes | More than 5 times | Exclusive    | No  | No  | Yes | No  | No  | nn  | No  | No  |
| K142 | Yes | Cavum              | Stage 4       | Metastasis  | >12 Months | Yes | More than 6 times | Exclusive    | Yes | No  | No  | Yes | Yes | Yes | Yes | Yes |
| K143 | Yes | Osteosarcoma       | Stage 4       | Metastasis  | >12 Months | Yes | Less than 4 times | Exclusive    | Yes | No  | No  | No  | No  | No  | No  | Yes |
| K144 | Yes | Kaposi sarcoma     | Unknwon stage |             | 6 Months   | Yes | Less than 4 times | Exclusive    | No  | Yes | Yes | No  | No  | No  | Yes | Yes |
| K145 | Yes | Breast             | Stage 4       | Metastasis  | >12 Months | Yes | More than 6 times | Adjuvant     | No  | Yes | Yes | No  | No  | Yes | Yes | Yes |
| K146 | Yes | Cervical           | Stage 4       | Metastasis  | 6 Months   | No  |                   |              | No  | Yes | Yes | No  | No  | No  | Yes | Yes |
| K147 | Yes | Cavum              | Stage 4       | Metastasis  | >12 Months | Yes | More than 6 times | Exclusive    | Yes | Yes | No  | Yes | Yes | Yes | Yes | Yes |
| K148 | Yes | Kaposi sarcoma     | Unknwon stage |             | 12 Months  | Yes | Less than 4 times |              | No  | Yes | Yes | No  | No  | No  | No  | No  |

|      |     |                    |               |             |            |     |                   |              |     |     |     |     |     |     |     |     |     |
|------|-----|--------------------|---------------|-------------|------------|-----|-------------------|--------------|-----|-----|-----|-----|-----|-----|-----|-----|-----|
| K149 | Yes | Breast             | Stage 4       | Metastasis  | >12 Months | Yes | More than 6 times | Adjuvant     | No  | Yes | Yes | Yes | Yes | Yes | Yes | Yes | Yes |
| K150 | Yes | Breast             | Stage 4       | Metastasis  | >12 Months | Yes | More than 6 times | Adjuvant     | No  | Yes | Yes | Yes | Yes | Yes | Yes | Yes | Yes |
| K151 | Yes | Cholangiocarcinoma | Stage 4       | Metastasis  | >12 Months | No  |                   |              | No  | Yes | Yes | Yes | Yes | Yes | Yes | Yes | Yes |
| K152 | Yes | Breast             | Stage 4       | Metastasis  | >12 Months | Yes | More than 6 times | Adjuvant     | Yes | No  | No  | Yes | Yes | Yes | Yes | Yes | Yes |
| K153 | Yes | Breast             | Stage 3       | Lymph nodes | 6 Months   | No  |                   |              | No  | No  | No  | No  | No  | No  | No  | No  | No  |
| K154 | Yes | Breast             | Stage 4       | Metastasis  | >12 Months | Yes | More than 6 times | Adjuvant     | No  | Yes | Yes | No  | No  | No  | No  | No  | Yes |
| K155 | Yes | Pancreas           | Stage 4       | Metastasis  | >12 Months | Yes | More than 6 times | Exclusive    | No  | Yes | Yes | No  | No  | No  | No  | Yes | Yes |
| K156 | Yes | Breast             | Stage 4       | Metastasis  | >12 Months | Yes | Less than 4 times | Palliative   | No  | Yes | Yes | No  | No  | No  | No  | No  | Yes |
| K157 | Yes | Breast             | Stage 4       | Metastasis  | >12 Months | Yes | More than 6 times | Palliative   | No  | Yes | Yes | No  | No  | No  | No  | Yes | Yes |
| K158 | Yes | Leukemia           | Stage 4       | Metastasis  | >12 Months | Yes | Less than 4 times | Exclusive    | No  | Yes | Yes | No  | No  | No  | No  | No  | Yes |
| K159 | Yes | Cavum              | Unknwon stage |             | >12 Months | Yes | More than 6 times | Exclusive    | No  | Yes | Yes | No  | No  | No  | No  | No  | No  |
| K160 | Yes | Breast             | Stage 4       | Metastasis  | >12 Months | Yes | More than 6 times | neo-Adjuvant | Yes | Yes | No  | No  | No  | No  | No  | No  | No  |
| K161 | Yes | Cavum              | Unknwon stage |             | 12 Months  | Yes | More than 6 times | Exclusive    | No  | No  | No  | No  | No  | No  | No  | No  | Yes |
| K162 | Yes | Cervical           | Stage 4       | Metastasis  | 12 Months  | Yes | More than 6 times | Exclusive    | No  | Yes | Yes | Yes | Yes | Yes | Yes | No  | Yes |
| K163 | Yes | Breast             | Stage 3       | Lymph nodes | 12 Months  | Yes | Less than 4 times | Adjuvant     | No  | Yes | Yes | No  | No  | No  | No  | No  | No  |
| K164 | Yes | Cervical           | Stage 4       | Metastasis  | >12 Months | Yes | More than 6 times | neo-Adjuvant | Yes | Yes | No  | Yes | Yes | Yes | Yes | Yes | Yes |
| K165 | Yes | Cavum              | Stage 3       | Lymph nodes | 12 Months  | Yes | More than 6 times | Exclusive    | No  | Yes | Yes | No  | Yes | Yes | Yes | Yes | Yes |
| K166 | Yes | Prostate           | Stage 4       | Metastasis  | >12 Months | Yes | More than 6 times | Palliative   | No  | Yes | Yes | No  | No  | No  | Yes | Yes | Yes |
| K167 | Yes | Pancreas           | Stage 4       | Metastasis  | >12 Months | No  |                   |              | No  | Yes | Yes | Yes | No  | No  | Yes | Yes | Yes |
| K168 | Yes | Stomach            | Unknwon stage |             | 12 Months  | Yes | Less than 4 times | neo-Adjuvant | Yes | No  | No  | Yes | No  | No  | Yes | No  | Yes |
| K169 | Yes | Stomach            | Stage 4       | Metastasis  | >12 Months | Yes | Less than 4 times | neo-Adjuvant | No  | Yes | Yes | Yes | No  | No  | Yes | Yes | Yes |
| K170 | Yes | Breast             | Stage 4       | Metastasis  | >12 Months | Yes | More than 6 times | Palliative   | No  | Yes | Yes | No  | No  | No  | No  | Yes | Yes |
| K171 | Yes | Cholangiocarcinoma | Stage 4       | Metastasis  | >12 Months | No  |                   |              | No  | Yes | Yes | No  | No  | No  | No  | No  | Yes |
| K172 | Yes | Colorectal         | Stage 4       | Metastasis  | >12 Months | No  |                   |              | Yes | Yes | No  | No  | Yes | Yes | Yes | Yes | Yes |

|      |     |                |               |             |            |     |                   |              |     |     |     |     |     |     |     |     |
|------|-----|----------------|---------------|-------------|------------|-----|-------------------|--------------|-----|-----|-----|-----|-----|-----|-----|-----|
| K173 | Yes | Osteosarcoma   | Stage 3       | Metastasis  | >12 Months | Yes | More than 6 times | Exclusive    | No  | Yes | Yes | No  | No  | No  | No  | No  |
| K174 | Yes | Colorectal     | Stage 4       | Metastasis  | >12 Months | Yes | More than 6 times | Palliative   | No  | Yes | Yes | Yes | Yes | Yes | Yes | Yes |
| K175 | Yes | Kaposi sarcoma | Stage 4       | Metastasis  | >12 Months | No  |                   |              | No  | Yes | Yes | No  | Yes | No  | Yes | Yes |
| K176 | Yes | Colorectal     | Stage 4       | Metastasis  | >12 Months | No  |                   |              | No  | Yes | Yes | No  | No  | No  | No  | Yes |
| K177 | Yes | Pancreas       | Stage 4       | Metastasis  | >12 Months | No  |                   |              | Yes | Yes | No  | No  | Yes | Yes | Yes | Yes |
| K178 | Yes | Kaposi sarcoma | Stage 3       | Lymph nodes | >12 Months | Yes | More than 6 times | Exclusive    | No  | Yes | Yes | No  | Yes | Yes | No  | Yes |
| K179 | Yes | Osteosarcoma   | Stage 3       | Lymph nodes | 6 Months   | Yes | Less than 4 times | Exclusive    | No  | No  | Yes | No  | No  | No  | Yes | Yes |
| K180 | Yes | Breast         | Stage 3       | Lymph nodes | >12 Months | Yes | More than 6 times | neo-Adjuvant | No  | Yes | Yes | No  | No  | No  | No  | Yes |
| K181 | Yes | Leukemia       | Unknwon stage |             | 6 Months   | Yes | Less than 4 times | Exclusive    | No  | No  | Yes | No  | No  | No  | Yes | Yes |
| K182 | Yes | Lung           | Unknwon stage |             | 6 Months   | Yes | Less than 4 times | Exclusive    | No  | Yes | Yes | No  | No  | No  | Yes | No  |
| K183 | Yes | Leukemia       | Stage 2       | Tumeur      | 6 Months   | No  |                   |              | Yes | Yes | Yes | No  | No  | Yes | Yes | Yes |
| K184 | Yes | Prostate       | Stage 4       | Metastasis  | >12 Months | Yes | Less than 4 times | Exclusive    | No  | Yes | Yes | No  | No  | No  | No  | No  |
| K185 | Yes | Breast         | Unknwon stage |             | 12 Months  | Yes | Less than 4 times | Exclusive    | No  | No  | Yes | No  | No  | No  | No  | No  |
| K186 | Yes | Breast         | Stage 3       | Lymph nodes | 12 Months  | Yes | Less than 4 times | neo-Adjuvant | No  | Yes | Yes | Yes | Yes | Yes | Yes | Yes |
| K187 | Yes | Breast         | Stage 4       | Metastasis  | >12 Months | Yes | More than 6 times | Palliative   | Yes | Yes | Yes | Yes | Yes | Yes | Yes | Yes |
| K188 | Yes | Pancreas       | Stage 4       | Metastasis  | >12 Months | No  |                   |              | No  | Yes | Yes | Yes | Yes | Yes | Yes | Yes |
| K189 | Yes | Breast         | Stage 4       | Metastasis  | >12 Months | No  |                   |              | No  | Yes | Yes | No  | No  | Yes | No  | Yes |
| K190 | Yes | Breast         | Stage 4       | Metastasis  | >12 Months | No  |                   |              | No  | Yes | Yes | No  | No  | No  | Yes | Yes |
| K191 | Yes | Osteosarcoma   | Unknwon stage |             | 6 Months   | Yes | Less than 4 times | Exclusive    | No  | No  | Yes | No  | No  | No  | No  | Yes |
| K192 | Yes | Cavum          | Unknwon stage |             | >12 Months | Yes | More than 6 times | Exclusive    | No  | Yes | Yes | No  | No  | Yes | Yes | Yes |
| K193 | Yes | Colorectal     | Stage 4       | Metastasis  | >12 Months | No  |                   |              | No  | Yes | Yes | No  | No  | No  | No  | No  |
| K194 | Yes | Breast         | Stage 4       | Metastasis  | >12 Months | Yes | More than 6 times | Adjuvant     | No  | Yes | Yes | No  | No  | No  | No  | Yes |
| K195 | Yes | Kaposi sarcoma | Stage 4       | Metastasis  | >12 Months | Yes | More than 6 times | Exclusive    | No  | No  | Yes | No  | No  | No  | No  | No  |
| K196 | Yes | Osteosarcoma   | Stage 4       | Metastasis  | >12 Months | Yes | More than 6 times | Exclusive    | No  | Yes | Yes | No  | Yes | Yes | Yes | Yes |
| K197 | Yes | Osteosarcoma   | Stage 4       | Metastasis  | >12 Months | Yes | More than 6 times | Exclusive    | No  | Yes | Yes | No  | No  | No  | No  | No  |

|      |     |                    |               |             |            |     |                   |              |     |     |     |     |     |     |     |     |
|------|-----|--------------------|---------------|-------------|------------|-----|-------------------|--------------|-----|-----|-----|-----|-----|-----|-----|-----|
| K198 | Yes | Breast             | Stage 4       | Metastasis  | >12 Months | Yes | More than 6 times | neo-Adjuvant | No  | Yes | Yes | No  | No  | No  | No  | Yes |
| K199 | Yes | Lung               | Stage 4       | Metastasis  | >12 Months | No  |                   |              | No  | Yes | Yes | No  | Yes | Yes | Yes | Yes |
| K200 | Yes | Breast             | Stage 4       | Metastasis  | >12 Months | Yes | Less than 4 times | neo-Adjuvant | No  | No  | Yes | No  | No  | No  | No  | Yes |
| K201 | Yes | Colorectal         | Stage 4       | Metastasis  | >12 Months | Yes | More than 6 times | neo-Adjuvant | No  | No  | Yes | No  | No  | No  | No  | No  |
| K202 | Yes | Osteosarcoma       | Stage 4       | Metastasis  | >12 Months | No  |                   |              | No  | Yes | Yes | No  | Yes | Yes | Yes | Yes |
| K203 | Yes | Osteosarcoma       | Stage 3       | Lymph nodes | >12 Months | No  |                   |              | Yes | Yes | No  | No  | No  | Yes | Yes | Yes |
| K204 | Yes | Cervical           | Stage 4       | Metastasis  | >12 Months | Yes | Less than 4 times | Exclusive    | No  | No  | Yes | No  | No  | No  | No  | No  |
| K205 | Yes | Cervical           | Stage 4       | Metastasis  | >12 Months | No  |                   |              | Yes | Yes | No  | No  | No  | Yes | No  | Yes |
| K206 | Yes | Breast             | Stage 3       | Lymph nodes | 12 Months  | Yes | More than 6 times | neo-Adjuvant | No  | No  | Yes | No  | No  | No  | No  | No  |
| K207 | Yes | Breast             | Stage 3       | Lymph nodes | 12 Months  | Yes | More than 6 times | neo-Adjuvant | No  | No  | Yes | No  | No  | No  | Yes | Yes |
| K208 | Yes | Breast             | Stage 4       | Metastasis  | >12 Months | Yes | More than 6 times | neo-Adjuvant | No  | Yes | Yes | Yes | No  | No  | No  | Yes |
| K209 | Yes | Colorectal         | Stage 4       | Metastasis  | 12 Months  | Yes | Less than 4 times | Exclusive    | No  | Yes | Yes | No  | No  | No  | No  | No  |
| K210 | Yes | Cervical           | Stage 3       | Lymph nodes | 12 Months  | No  |                   |              | No  | Yes | Yes | Yes | Yes | Yes | Yes | Yes |
| K211 | Yes | Breast             | Stage 3       | Lymph nodes | 6 Months   | Yes | Less than 4 times | Exclusive    | No  | No  | Yes | Yes | No  | No  | Yes | Yes |
| K212 | Yes | Cavum              | Stage 3       | Lymph nodes | 12 Months  | Yes | Less than 4 times | Exclusive    | Yes | No  | No  | Yes | No  | No  | Yes | Yes |
| K213 | Yes | Breast             | Stage 4       | Metastasis  | >12 Months | Yes | More than 6 times | neo-Adjuvant | No  | Yes | Yes | No  | No  | No  | No  | No  |
| K214 | Yes | Breast             | Unknwon stage |             | 6 Months   | Yes | Less than 4 times | neo-Adjuvant | No  | Yes | Yes | No  | No  | No  | Yes | No  |
| K215 | Yes | Breast             | Stage 4       | Metastasis  | >12 Months | Yes | More than 6 times | Exclusive    | No  | Yes | Yes | No  | Yes | Yes | Yes | No  |
| K216 | Yes | Breast             | Unknwon stage |             | 6 Months   | Yes | Less than 4 times | neo-Adjuvant | No  | Yes | Yes | No  | Yes | Yes | Yes | Yes |
| K217 | Yes | Cholangiocarcinoma | Stage 4       | Metastasis  | >12 Months | Yes | Less than 4 times | Exclusive    | Yes | Yes | Yes | No  | No  | No  | No  | Yes |
| K218 | Yes | Breast             | Stage 4       | Metastasis  | 12 Months  | Yes | Less than 4 times | neo-Adjuvant | No  | No  | Yes | No  | No  | No  | No  | No  |
| K219 | Yes | Breast             | Stage 3       | Lymph nodes | 6 Months   | Yes | Less than 4 times | neo-Adjuvant | No  | Yes | Yes | No  | Yes | Yes | Yes | Yes |
| K220 | Yes | Breast             | Stage 4       | Metastasis  | 6 Months   | No  |                   |              | No  | Yes | Yes | Yes | Yes | Yes | Yes | Yes |
| K221 | Yes | Breast             | Stage 4       | Metastasis  | 12 Months  | No  |                   |              | No  | Yes | Yes | No  | Yes | Yes | No  | Yes |
| K222 | Yes | Stomach            | Stage 4       | Metastasis  | 6 Months   | Yes | Less than 4 times | neo-Adjuvant | Yes | Yes | No  | Yes | No  | No  | No  | Yes |

|      |     |              |               |             |            |     |                   |              |     |     |     |     |     |     |     |     |
|------|-----|--------------|---------------|-------------|------------|-----|-------------------|--------------|-----|-----|-----|-----|-----|-----|-----|-----|
| K223 | Yes | Cervical     | Stage 3       | Lymph nodes | 6 Months   | No  |                   |              | No  | Yes | Yes | Yes | No  | Yes | No  | Yes |
| K224 | Yes | Leukemia     | Stage 4       | Metastasis  | 12 Months  | No  |                   |              | No  | Yes | Yes | Yes | Yes | Yes | Yes | Yes |
| K225 | Yes | Stomach      | Unknwon stage |             | 6 Months   | Yes | Less than 4 times | neo-Adjuvant | No  | Yes | Yes | No  | No  | No  | No  | Yes |
| K226 | Yes | Cervical     | Stage 3       | Lymph nodes | 6 Months   | Yes | Less than 4 times | neo-Adjuvant | No  | Yes | Yes | Yes | No  | Yes | Yes | Yes |
| K227 | Yes | Cervical     | Stage 4       | Metastasis  | >12 Months | No  |                   |              | Yes | No  | No  | No  | No  | No  | No  | Yes |
| K228 | Yes | Breast       | Stage 4       | Metastasis  | 6 Months   | No  |                   |              | Yes | No  | Yes | No  | Yes | No  | No  | No  |
| K229 | Yes | Eusophagus   | Unknwon stage |             | 6 Months   | Yes | Less than 4 times | neo-Adjuvant | No  | No  | Yes | Yes | No  | No  | No  | Yes |
| K230 | Yes | Cervical     | Stage 3       | Lymph nodes | 12 Months  | Yes | Less than 4 times | Exclusive    | No  | Yes | Yes | Yes | No  | No  | Yes | Yes |
| K231 | Yes | Cervical     | Stage 4       | Metastasis  | >12 Months | Yes | Less than 4 times | Exclusive    | No  | Yes | Yes | No  | No  | Yes | No  | Yes |
| K232 | Yes | Cervical     | Stage 4       | Metastasis  | >12 Months | Yes | More than 6 times | Exclusive    | No  | No  | Yes | No  | Yes | Yes | No  | Yes |
| K233 | Yes | Osteosarcoma | Stage 4       | Metastasis  | 12 Months  | No  |                   |              | No  | Yes | Yes | Yes | Yes | Yes | Yes | Yes |
| K234 | Yes | Breast       | Stage 4       | Metastasis  | >12 Months | No  |                   |              | No  | Yes | Yes | Yes | No  | No  | Yes | Yes |
| K235 | Yes | Cervical     | Stage 4       | Metastasis  | 12 Months  | No  |                   |              | No  | Yes | Yes | No  | No  | Yes | Yes | Yes |
| K236 | Yes | Prostate     | Stage 4       | Metastasis  | >12 Months | No  |                   |              | No  | Yes | Yes | Yes | Yes | Yes | Yes | Yes |
| K237 | Yes | Stomach      | Stage 4       | Metastasis  | 12 Months  | No  |                   |              | No  | Yes | Yes | Yes | No  | No  | No  | Yes |
| K238 | Yes | Eusophagus   | Stage 3       | Lymph nodes | 6 Months   | No  |                   |              | No  | Yes | Yes | No  | Yes | Yes | Yes | Yes |
| K239 | Yes | Cervical     | Stage 4       | Metastasis  | 6 Months   | No  |                   |              | No  | Yes | Yes | No  | No  | Yes | Yes | Yes |
| K240 | Yes | Stomach      | Stage 4       | Metastasis  | 12 Months  | No  |                   |              | No  | Yes | Yes | Yes | Yes | Yes | Yes | Yes |
| K241 | Yes | Breast       | Stage 4       | Metastasis  | 12 Months  | Yes | More than 6 times | Exclusive    | Yes | No  | Yes | No  | Yes | Yes | Yes | Yes |
| K242 | Yes | Breast       | Stage 3       | Lymph nodes | 6 Months   | Yes | Less than 4 times | neo-Adjuvant | No  | Yes | Yes | No  | No  | No  | Yes | Yes |
| K243 | Yes | Ovary        | Stage 4       | Metastasis  | 12 Months  | Yes | More than 6 times | Exclusive    | No  | Yes | Yes | Yes | Yes | Yes | Yes | Yes |
| K244 | Yes | Breast       | Stage 3       | Lymph nodes | 12 Months  | Yes | More than 6 times | neo-Adjuvant | No  | Yes | Yes | No  | No  | No  | No  | No  |
| K245 | Yes | Cervical     | Stage 4       | Metastasis  | 6 Months   | Yes | Less than 4 times | neo-Adjuvant | No  | Yes | Yes | Yes | Yes | Yes | Yes | Yes |
| K246 | Yes | Ovary        | Stage 4       | Metastasis  | >12 Months | Yes | More than 6 times | Palliative   | No  | Yes | Yes | No  | Yes | No  | Yes | Yes |
| K247 | Yes | Breast       | Stage 4       | Metastasis  | 6 Months   | No  |                   |              | No  | Yes | Yes | No  | No  | No  | No  | Yes |
| K248 | Yes | Liver        | Stage 4       | Metastasis  | 6 Months   | No  |                   |              | No  | Yes | Yes | No  | Yes | Yes | Yes | Yes |

|      |     |                |               |             |            |     |                   |              |     |     |     |     |     |     |     |     |
|------|-----|----------------|---------------|-------------|------------|-----|-------------------|--------------|-----|-----|-----|-----|-----|-----|-----|-----|
| K249 | Yes | Pancreas       | Unknwon stage |             | 6 Months   | Yes | More than 6 times | Adjuvant     | No  | No  | Yes | No  | No  | No  | No  | No  |
| K250 | Yes | Cervical       | Stage 4       | Metastasis  | 6 Months   | No  |                   |              | No  | Yes | Yes | Yes | Yes | Yes | Yes | Yes |
| K251 | Yes | Ovary          | Stage 4       | Metastasis  | >12 Months | Yes | More than 6 times | Palliative   | No  | Yes | Yes | No  | No  | No  | No  | Yes |
| K252 | Yes | Osteosarcoma   | Stage 4       | Metastasis  | 12 Months  | Yes | Less than 4 times | neo-Adjuvant | No  | Yes | Yes | No  | No  | No  | No  | Yes |
| K253 | Yes | Eusophagus     | Stage 4       | Metastasis  | 6 Months   | No  |                   |              | No  | Yes | Yes | No  | No  | No  | No  | No  |
| K254 | Yes | Stomach        | Stage 4       | Metastasis  | 6 Months   | Yes | Less than 4 times | neo-Adjuvant | Yes | No  | Yes | No  | No  | No  | Yes | Yes |
| K255 | Yes | Prostate       | Stage 4       | Metastasis  | >12 Months | Yes | Less than 4 times | Palliative   | No  | Yes | Yes | No  | No  | Yes | Yes | Yes |
| K256 | Yes | Liver          | Stage 4       | Metastasis  | 6 Months   | No  |                   |              | No  | Yes | Yes | Yes | Yes | Yes | Yes | Yes |
| K257 | Yes | Liver          | Stage 4       | Metastasis  | 12 Months  | No  |                   |              | No  | Yes | Yes | Yes | Yes | Yes | Yes | Yes |
| K258 | Yes | Cervical       | Stage 4       | Metastasis  | 12 Months  | No  |                   |              | No  | Yes | Yes | Yes | Yes | Yes | Yes | Yes |
| K259 | Yes | Ovary          | Stage 4       | Metastasis  | 6 Months   | Yes | Less than 4 times | neo-Adjuvant | No  | Yes | Yes | Yes | Yes | Yes | Yes | Yes |
| K260 | Yes | Breast         | Stage 3       | Lymph nodes | 12 Months  | Yes | More than 6 times | Adjuvant     | No  | Yes | Yes | No  | No  | Yes | Yes | Yes |
| K261 | Yes | Cervical       | Unknwon stage |             | 6 Months   | Yes | Less than 4 times | neo-Adjuvant | No  | Yes | Yes | No  | No  | No  | No  | Yes |
| K262 | Yes | Eusophagus     | Stage 3       | Lymph nodes | 6 Months   | Yes | Less than 4 times | neo-Adjuvant | No  | Yes | Yes | Yes | Yes | Yes | Yes | Yes |
| K263 | Yes | Cervical       | Stage 3       | Lymph nodes | 6 Months   | Yes | Less than 4 times | neo-Adjuvant | No  | Yes | Yes | No  | No  | No  | Yes | Yes |
| K264 | Yes | Eusophagus     | Unknwon stage |             | 6 Months   | No  |                   |              | No  | Yes | Yes | No  | No  | No  | No  | Yes |
| K265 | Yes | Breast         | Stage 3       | Lymph nodes | 6 Months   | Yes | More than 6 times | neo-Adjuvant | No  | Yes | Yes | Yes | Yes | Yes | Yes | Yes |
| K266 | Yes | Breast         | Stage 4       | Metastasis  | 6 Months   | Yes | More than 6 times | Palliative   | No  | Yes | Yes | Yes | Yes | Yes | No  | Yes |
| K267 | Yes | Kaposi sarcoma | Unknwon stage |             | >12 Months | Yes | Less than 4 times | Exclusive    | No  | Yes | Yes | Yes | Yes | Yes | Yes | Yes |
| K268 | Yes | Breast         | Stage 4       | Metastasis  | >12 Months | Yes | More than 6 times | Adjuvant     | No  | Yes | Yes | Yes | Yes | Yes | Yes | No  |
| K269 | Yes | Breast         | Stage 4       | Metastasis  | >12 Months | Yes | More than 6 times | Adjuvant     | No  | Yes | Yes | No  | No  | Yes | Yes | Yes |
| K270 | Yes | Pancreas       | Stage 4       | Metastasis  | 12 Months  | Yes | More than 6 times | Adjuvant     | Yes | Yes | Yes | Yes | Yes | Yes | Yes | Yes |
| K271 | Yes | Breast         | Stage 3       | Lymph nodes | 12 Months  | Yes | More than 6 times | neo-Adjuvant | No  | Yes | Yes | Yes | No  | No  | Yes | Yes |
| K272 | Yes | Cervical       | Stage 4       | Metastasis  | 12 Months  | No  |                   |              | No  | Yes | Yes | No  | No  | Yes | Yes | Yes |
| K273 | Yes | Breast         | Stage 4       | Metastasis  | 6 Months   | No  |                   |              | No  | Yes | Yes | No  | Yes | Yes | Yes | Yes |

|      |     |                |               |             |            |     |                   |              |     |     |     |     |     |     |     |     |     |
|------|-----|----------------|---------------|-------------|------------|-----|-------------------|--------------|-----|-----|-----|-----|-----|-----|-----|-----|-----|
| K274 | Yes | Cervical       | Stage 4       | Metastasis  | 12 Months  | Yes | More than 6 times | Exclusive    | No  | Yes | Yes | Yes | Yes | Yes | Yes | Yes | Yes |
| K275 | Yes | Breast         | Stage 4       | Metastasis  | >12 Months | Yes | More than 6 times | Adjuvant     | Yes | Yes | No  | No  | Yes | Yes | Yes | Yes | Yes |
| K276 | Yes | Breast         | Stage 4       | Metastasis  | 6 Months   | Yes | More than 6 times | neo-Adjuvant | No  | No  | Yes | No  | No  | No  | No  | No  | No  |
| K277 | Yes | Breast         | Stage 4       | Metastasis  | 6 Months   | Yes | More than 6 times | Adjuvant     | No  | Yes | Yes | No  | No  | Yes | Yes | Yes | Yes |
| K278 | Yes | Lung           | Stage 3       | Lymph nodes | 6 Months   | Yes | More than 6 times | neo-Adjuvant | No  | Yes | Yes | Yes | Yes | Yes | Yes | Yes | Yes |
| K279 | Yes | Breast         | Stage 4       | Metastasis  | 6 Months   | Yes | More than 6 times | Adjuvant     | No  | Yes | Yes | Yes | Yes | Yes | Yes | Yes | Yes |
| K280 | Yes | Liver          | Stage 4       | Metastasis  | 6 Months   | No  |                   |              | No  | Yes | Yes | Yes | Yes | Yes | Yes | Yes | Yes |
| K281 | Yes | Breast         | Stage 3       | Lymph nodes | >12 Months | Yes | More than 6 times | Adjuvant     | No  | Yes | Yes | No  | No  | No  | Yes | Yes | Yes |
| K282 | Yes | Breast         | Stage 4       | Metastasis  | 6 Months   | No  |                   |              | No  | Yes | Yes | No  | No  | Yes | No  | Yes | Yes |
| K283 | Yes | Kaposi sarcoma | Stage 4       | Metastasis  | 6 Months   | No  |                   |              | No  | Yes | Yes | No  | No  | No  | No  | No  | Yes |
| K284 | Yes | Cervical       | Stage 4       | Metastasis  | 6 Months   | No  |                   |              | No  | Yes | Yes | No  | No  | No  | Yes | Yes | Yes |
| K285 | Yes | Cervical       | Stage 4       | Metastasis  | 6 Months   | No  |                   |              | No  | Yes | Yes | No  | No  | No  | No  | No  | No  |
| K286 | Yes | Liver          | Stage 4       | Metastasis  | >12 Months | No  |                   |              | No  | Yes | Yes | No  | Yes | Yes | Yes | Yes | Yes |
| K287 | Yes | Stomach        | Stage 4       | Metastasis  | 6 Months   | Yes | More than 6 times | Palliative   | No  | Yes | Yes | Yes | Yes | Yes | Yes | Yes | Yes |
| K288 | Yes | Breast         | Unknwon stage |             | 6 Months   | Yes | More than 6 times | neo-Adjuvant | No  | Yes | Yes | No  | No  | No  | No  | No  | No  |
| K289 | Yes | Lung           | Stage 3       | Lymph nodes | 6 Months   | Yes | Less than 4 times | Exclusive    | Yes | Yes | No  | No  | No  | No  | No  | No  | Yes |
| K290 | Yes | Pancreas       | Stage 4       | Metastasis  | 12 Months  | Yes | More than 6 times | Exclusive    | No  | No  | Yes | No  | No  | No  | No  | No  | Yes |
| K291 | Yes | Colorectal     | Stage 3       | Lymph nodes | 6 Months   | Yes | More than 6 times | Adjuvant     | No  | Yes | Yes | Yes | Yes | Yes | Yes | Yes | Yes |
| K292 | Yes | Kaposi sarcoma | Stage 4       | Metastasis  | >12 Months | Yes | More than 6 times | Exclusive    | No  | Yes | Yes | No  | Yes | No  | Yes | Yes | Yes |
| K293 | Yes | Breast         | Stage 4       | Metastasis  | 6 Months   | No  |                   |              | No  | Yes | Yes | No  | Yes | Yes | Yes | Yes | Yes |
| K294 | Yes | Cervical       | Stage 4       | Metastasis  | 6 Months   | Yes | More than 6 times | Exclusive    | No  | Yes | Yes | Yes | No  | No  | No  | No  | Yes |
| K295 | Yes | Kaposi sarcoma | Stage 3       | Lymph nodes | 6 Months   | Yes | Less than 4 times | Exclusive    | No  | Yes | Yes | No  | No  | No  | No  | No  | No  |
| K296 | Yes | Breast         | Stage 3       | Lymph nodes | 12 Months  | Yes | More than 6 times | neo-Adjuvant | Yes | No  | No  | No  | Yes | Yes | Yes | Yes | Yes |
| K297 | Yes | Pancreas       | Stage 4       | Metastasis  | >12 Months | Yes | More than 6 times | Adjuvant     | No  | Yes | Yes | No  | No  | No  | No  | No  | Yes |
| K298 | Yes | Breast         | Unknwon stage |             | 6 Months   | Yes | Less than 4 times | neo-Adjuvant | No  | Yes | Yes | No  | No  | No  | No  | No  | No  |

|                                                          |     |              |         |            |            |     |                   |            |     |     |     |     |     |     |     |     |     |
|----------------------------------------------------------|-----|--------------|---------|------------|------------|-----|-------------------|------------|-----|-----|-----|-----|-----|-----|-----|-----|-----|
| K299                                                     | Yes | Pancreas     | Stage 4 | Metastasis | 12 Months  | No  |                   |            | No  | Yes | Yes | Yes | Yes | Yes | Yes | Yes | Yes |
| K300                                                     | Yes | Prostate     | Stage 4 | Metastasis | 12 Months  | No  |                   |            | No  | Yes | Yes | No  | Yes | Yes | Yes | Yes | Yes |
| K301                                                     | Yes | Osteosarcoma | Stage 4 | Metastasis | 6 Months   | No  |                   |            | Yes | Yes | No  | No  | No  | No  | Yes | Yes | Yes |
| K302                                                     | Yes | Liver        | Stage 4 | Metastasis | 12 Months  | No  |                   |            | No  | Yes | Yes | No  | No  | No  | No  | No  | No  |
| K303                                                     | Yes | Ovary        | Stage 4 | Metastasis | 12 Months  | No  |                   |            | No  | Yes | No  | No  | No  | No  | No  | No  | Yes |
| K304                                                     | Yes | Ovary        | Stage 4 | Metastasis | 6 Months   | Yes | Less than 4 times | Palliative | No  | Yes | Yes | No  | No  | No  | No  | No  | No  |
| K305                                                     | Yes | Breast       | Stage 4 | Metastasis | 12 Months  | Yes | More than 6 times | Adjuvant   | Yes | Yes | No  | Yes | No  | Yes | Yes | Yes | Yes |
| K306                                                     | Yes | Leukemia     | Stage 4 | Metastasis | 6 Months   | Yes | More than 6 times | Exclusive  | No  | No  | Yes | Yes | Yes | Yes | Yes | Yes | Yes |
| K307                                                     | Yes | Breast       | Stage 4 | Metastasis | >12 Months | Yes | More than 6 times | Exclusive  | Yes | Yes | Yes | No  | Yes | Yes | No  | Yes | Yes |
| Legend: M, male; F, female; code with K, cancer patient; |     |              |         |            |            |     |                   |            |     |     |     |     |     |     |     |     |     |















|      |     |   |   |   |   |   |   |   |   |   |   |   |   |   |   |   |   |   |     |
|------|-----|---|---|---|---|---|---|---|---|---|---|---|---|---|---|---|---|---|-----|
| K171 | No  |   |   |   |   |   |   |   |   |   |   |   |   |   |   |   |   |   |     |
| K172 | No  |   |   |   |   |   |   |   |   |   |   |   |   |   |   |   |   |   |     |
| K173 | Yes | S | S | R | R | R | R | S | R | S | S | R | R | R | S | R | S | R | Yes |
| K174 | Yes | S | R | S | R | R | S | R | R | R | R | S | R | R | R | R | R | R | Yes |
| K175 | No  |   |   |   |   |   |   |   |   |   |   |   |   |   |   |   |   |   |     |
| K176 | No  |   |   |   |   |   |   |   |   |   |   |   |   |   |   |   |   |   |     |
| K177 | Yes | S | R | R | R | R | R | R | R | S | S | R | R | R | R | R | R | R | Yes |
| K178 | No  |   |   |   |   |   |   |   |   |   |   |   |   |   |   |   |   |   |     |
| K179 | No  |   |   |   |   |   |   |   |   |   |   |   |   |   |   |   |   |   |     |
| K180 | No  |   |   |   |   |   |   |   |   |   |   |   |   |   |   |   |   |   |     |
| K181 | No  |   |   |   |   |   |   |   |   |   |   |   |   |   |   |   |   |   |     |
| K182 | No  |   |   |   |   |   |   |   |   |   |   |   |   |   |   |   |   |   |     |
| K183 | No  |   |   |   |   |   |   |   |   |   |   |   |   |   |   |   |   |   |     |
| K184 | No  |   |   |   |   |   |   |   |   |   |   |   |   |   |   |   |   |   |     |
| K185 | No  |   |   |   |   |   |   |   |   |   |   |   |   |   |   |   |   |   |     |
| K186 | No  |   |   |   |   |   |   |   |   |   |   |   |   |   |   |   |   |   |     |
| K187 | Yes | S | R | R | R | R | R | R | R | S | S | R | R | R | R | R | R | R | Yes |
| K188 | No  |   |   |   |   |   |   |   |   |   |   |   |   |   |   |   |   |   |     |
| K189 | Yes | S | R | R | R | R | S | S | R | S | S | R | R | R | R | R | R | R | Yes |
| K190 | Yes | S | S | S | S | S | R | S | R | S | S | S | S | I | R | R | R | R | No  |
| K191 | No  | S | S | S | S | R | S | S | S | S | S | S | S | S | S | S | S | R | No  |
| K192 | Yes | S | S | R | S | R | R | S | R | S | S | R | R | R | R | R | R | R | No  |
| K193 | Yes | S | S | R | R | R | R | R | R | S | S | R | R | S | R | R | R | R | Yes |
| K194 | No  |   |   |   |   |   |   |   |   |   |   |   |   |   |   |   |   |   |     |
| K195 | Yes | R | R | R | R | R | R | R | R | S | S | R | R | R | R | R | R | R | Yes |
| K196 | No  |   |   |   |   |   |   |   |   |   |   |   |   |   |   |   |   |   |     |
| K197 | No  |   |   |   |   |   |   |   |   |   |   |   |   |   |   |   |   |   |     |
| K198 | No  |   |   |   |   |   |   |   |   |   |   |   |   |   |   |   |   |   |     |
| K199 | Yes | S | S | R | S | R | R | S | R | S | S | S | S | S | R | R | R | R | No  |

























|      |    |  |  |  |  |  |  |  |  |  |  |  |  |  |  |  |  |  |  |  |
|------|----|--|--|--|--|--|--|--|--|--|--|--|--|--|--|--|--|--|--|--|
| D179 | No |  |  |  |  |  |  |  |  |  |  |  |  |  |  |  |  |  |  |  |
| D180 | No |  |  |  |  |  |  |  |  |  |  |  |  |  |  |  |  |  |  |  |
| D181 | No |  |  |  |  |  |  |  |  |  |  |  |  |  |  |  |  |  |  |  |
| D182 | No |  |  |  |  |  |  |  |  |  |  |  |  |  |  |  |  |  |  |  |
| D183 | No |  |  |  |  |  |  |  |  |  |  |  |  |  |  |  |  |  |  |  |
| D184 | No |  |  |  |  |  |  |  |  |  |  |  |  |  |  |  |  |  |  |  |
| D185 | No |  |  |  |  |  |  |  |  |  |  |  |  |  |  |  |  |  |  |  |
| D186 | No |  |  |  |  |  |  |  |  |  |  |  |  |  |  |  |  |  |  |  |
| D187 | No |  |  |  |  |  |  |  |  |  |  |  |  |  |  |  |  |  |  |  |
| D188 | No |  |  |  |  |  |  |  |  |  |  |  |  |  |  |  |  |  |  |  |
| D189 | No |  |  |  |  |  |  |  |  |  |  |  |  |  |  |  |  |  |  |  |
| D190 | No |  |  |  |  |  |  |  |  |  |  |  |  |  |  |  |  |  |  |  |
| D191 | No |  |  |  |  |  |  |  |  |  |  |  |  |  |  |  |  |  |  |  |
| D192 | No |  |  |  |  |  |  |  |  |  |  |  |  |  |  |  |  |  |  |  |
| D193 | No |  |  |  |  |  |  |  |  |  |  |  |  |  |  |  |  |  |  |  |
| D194 | No |  |  |  |  |  |  |  |  |  |  |  |  |  |  |  |  |  |  |  |
| D195 | No |  |  |  |  |  |  |  |  |  |  |  |  |  |  |  |  |  |  |  |
| D196 | No |  |  |  |  |  |  |  |  |  |  |  |  |  |  |  |  |  |  |  |
| D197 | No |  |  |  |  |  |  |  |  |  |  |  |  |  |  |  |  |  |  |  |
| D198 | No |  |  |  |  |  |  |  |  |  |  |  |  |  |  |  |  |  |  |  |
| D199 | No |  |  |  |  |  |  |  |  |  |  |  |  |  |  |  |  |  |  |  |
| D200 | No |  |  |  |  |  |  |  |  |  |  |  |  |  |  |  |  |  |  |  |

Legend: M, male; F, female; code with K, cancer patient; code with D, non-cancer patient
